# Supplementary material for: Unveiling the catalytic potency of a novel hydrazone-linked covalent organic framework for the highly efficient one-pot synthesis of 1,2,4-triazolidine-3-thiones
Source: Royal Society of Chemistry journal article supplement (doi:10.1039/d4na00650j), 2024-01-01
Supplement: d4na00650j1.pdf [file d4na00650j1.pdf]

## Supplementary file

### Unveiling the Catalytic Potency of a Novel Hydrazone-Linked Covalent Organic Framework for the Highly Efficient One-Pot Synthesis of 1,2,4-Triazolidine-3-Thiones

Pankaj Teli, Shivani Soni, Sunita Teli and Shikha Agarwal\*

Synthetic Organic Chemistry Laboratory, Department of Chemistry, Mohanlal Sukhadia University, Udaipur, Rajasthan, India

Email Id: [shikhaagarwal@mlsu.ac.in](mailto:shikhaagarwal@mlsu.ac.in), [pankajteli802@gmail.com](mailto:pankajteli802@gmail.com)

#### General remarks:

All the reagents and solvents were purchased from commercial suppliers and used without further purification unless otherwise noted. The COF was synthesized using an ultrasonic cleaner (Shumei KQ-100DB) with a power output of 100 W and a frequency of 40 KHz. Fourier transform infrared spectroscopy (FT-IR) was carried out with a Bruker Alpha FT-IR spectrometer. The samples for the IR study were prepared as KBr pellets. Scanning electron microscopy (SEM) was performed on a Hitachi (Japan), SU8010 series instrument. Transmission electron microscopy (TEM) was performed on a JEOL JEM-2100 plus instrument. Powder X-ray diffraction measurements were carried out with an X' Pert PROX system using monochromated Cu/K $\alpha$  ( $\lambda = 0.1542$  nm). The samples were spread on the square recess of an XRD sample holder as a thin layer. Nitrogen adsorption-desorption measurements were carried out using a *Quantachrome autosord IQ* automatic volumetric instrument. Before gas adsorption measurements, the as-prepared samples (~40 mg) were washed with anhydrous acetone through Soxhlet extraction for 6 h. The solvent was filtered and the samples were activated under vacuum at 120 °C for 8 h. Then the samples were used for gas adsorption-desorption measurements from 0 to 1 atm at 77 K. The Brunauer-Emmett-Teller (BET) method was utilized to calculate their specific surface areas. XPS was recorded on thermoscientific NEXA surface analyser, TGA and DTA recorded on Hitachi NEXTA STA300 device.

**Preparation of 4,4',4''-[1,3,5-Triazine-2,4,6-triyltris(oxy)]tris-benzaldehyde (TRIPOD).**

A reaction flask was prepared with cyanuric chloride (0.25 g, 1.35 mmol), 4-hydroxybenzaldehyde (0.51 g, 4.17 mmol), p-dioxane (20 mL), and Na<sub>2</sub>CO<sub>3</sub> (0.50 g, 4.72 mmol). The mixture was stirred and refluxed under a nitrogen atmosphere for 18 hours. After refluxing, the mixture was concentrated under reduced pressure, and the resulting concentrate was added to cold water (10 mL). The formed precipitate was collected by filtration, rinsed with cold water (5 mL), and dried to yield the desired product (0.441 g, 74%)<sup>1</sup>.

<sup>1</sup>H NMR (400 MHz, CDCl<sub>3</sub>) δ 9.98 (s, 3H, 3CHO), 7.91 (d, J = 8.5 Hz, 6H, Ar-H), 7.31 (d, J = 8.6 Hz, 6H, Ar-H); <sup>13</sup>C NMR (101 MHz, CDCl<sub>3</sub>) δ 190.80, 134.57, 131.45, 122.31.

### 1) Synthesis of trialdehyde (TRIPOD)

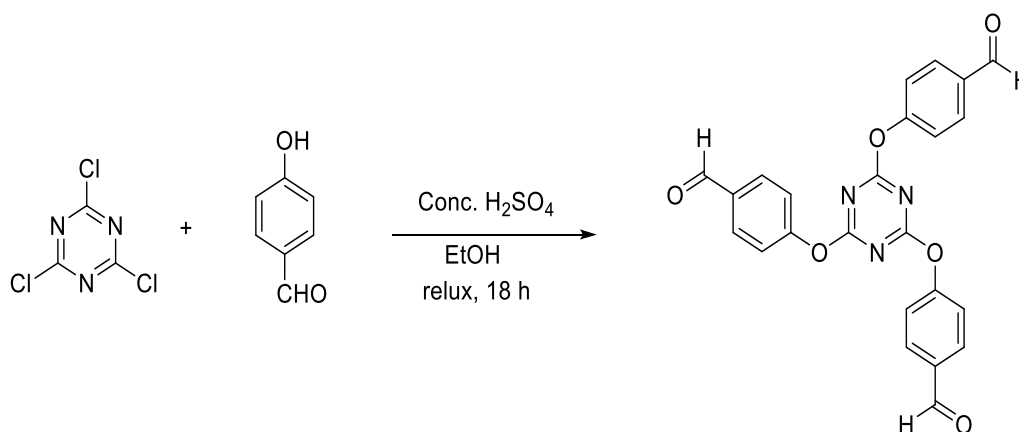

**Scheme 1: Synthesis of 4,4',4''-[1,3,5-Triazine-2,4,6-triyltris(oxy)]tris-benzaldehyde**

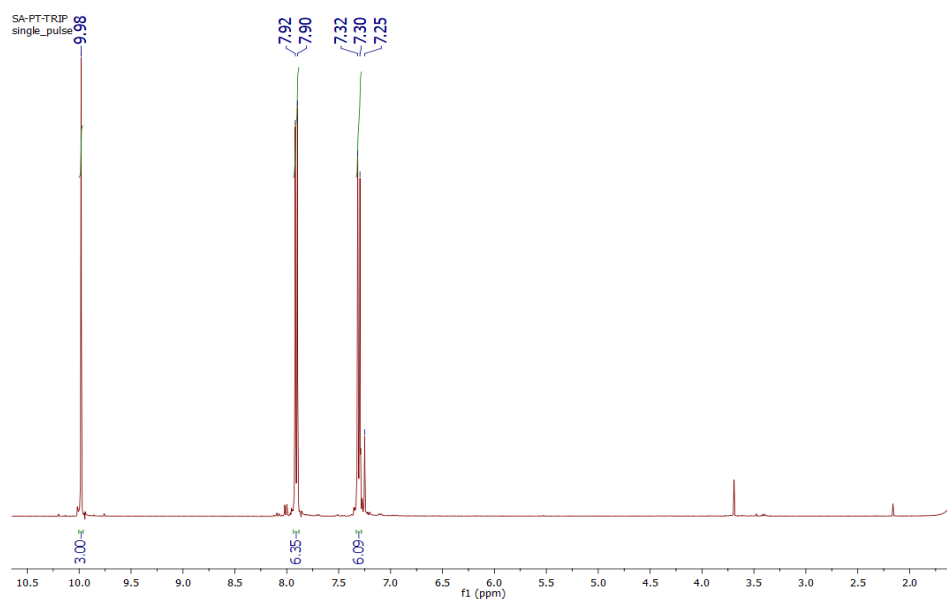

**Figure S1:  $^1\text{H}$  NMR spectra of 4,4',4''-[1,3,5-Triazine-2,4,6-triyltris(oxy)]tris-benzaldehyde**

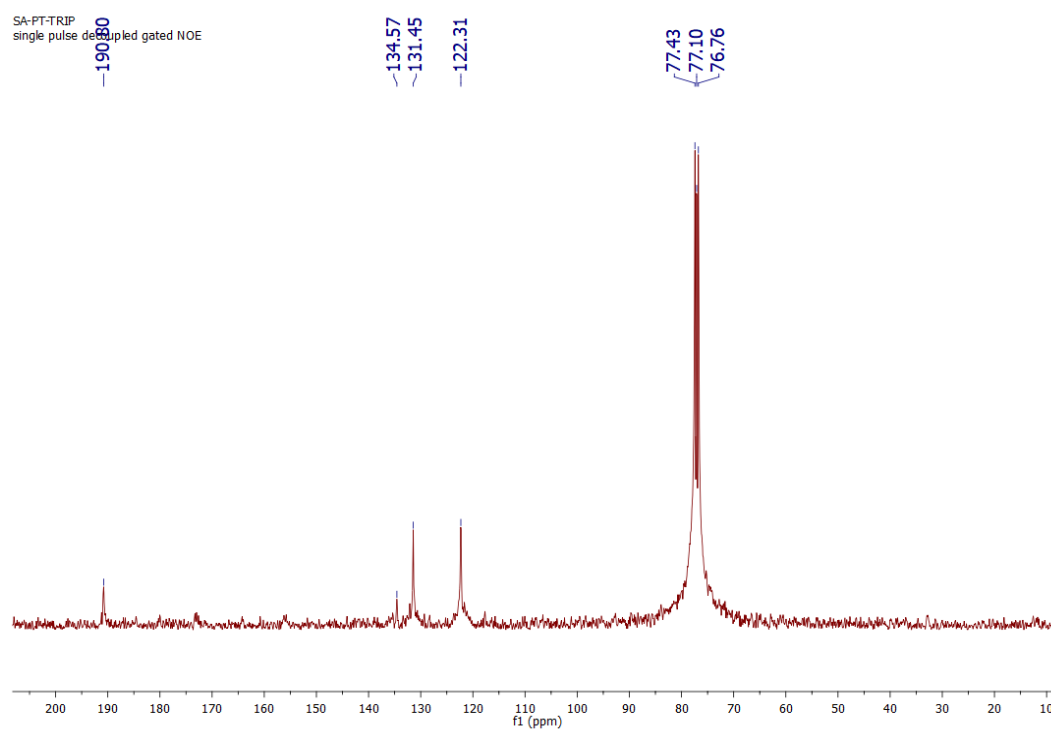

**Figure S2:  $^{13}\text{C}$  NMR spectra of 4,4',4''-[1,3,5-Triazine-2,4,6-triyltris(oxy)]tris-benzaldehyde**

### Synthesis of diethyl-2,5-dihydroxyterephthalate (DHTP)

A flask was charged with 2,5-dihydroxyterephthalic acid (0.75 g, 3.78 mmol) and dry ethanol (30 mL). To this mixture, 3 mL of concentrated sulfuric acid was added dropwise. The resulting mixture was refluxed for 18 hours until the solid fully dissolved. After

cooling to room temperature, 60 mL of deionized water was added. The precipitate formed was collected by filtration, thoroughly washed with deionized water, and then dried in an oven<sup>2</sup>.

Yield: 0.80 g, 83.06%. <sup>1</sup>H NMR (400 MHz, CDCl<sub>3</sub>) δ 10.15 (s, 2H, 2OH), 7.46 (s, 2H, Ar-H), 4.40 (q, *J* = 7.3 Hz, 4H, 2CH<sub>2</sub>), 1.41 (t, *J* = 7.2 Hz, 6H, 2CH<sub>3</sub>). <sup>13</sup>C NMR (101 MHz, CDCl<sub>3</sub>) δ 169.19, 152.98, 118.55, 117.78, 62.17, 14.17.

## 2) Synthesis of DHTP

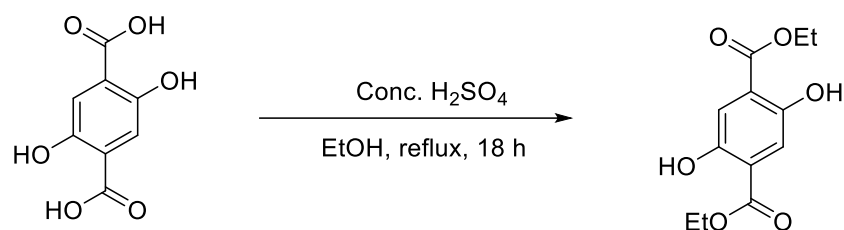

**Scheme 2 : Synthesis of diethyl-2,5-dihydroxyterephthalate**

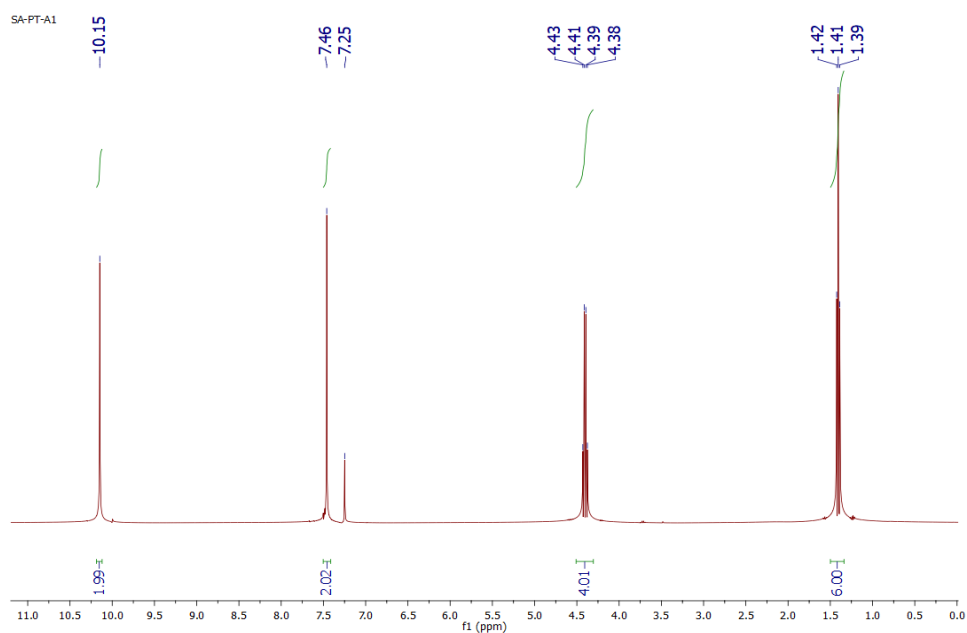

**Figure S3: <sup>1</sup>H NMR spectra of diethyl-2,5-dihydroxyterephthalate**

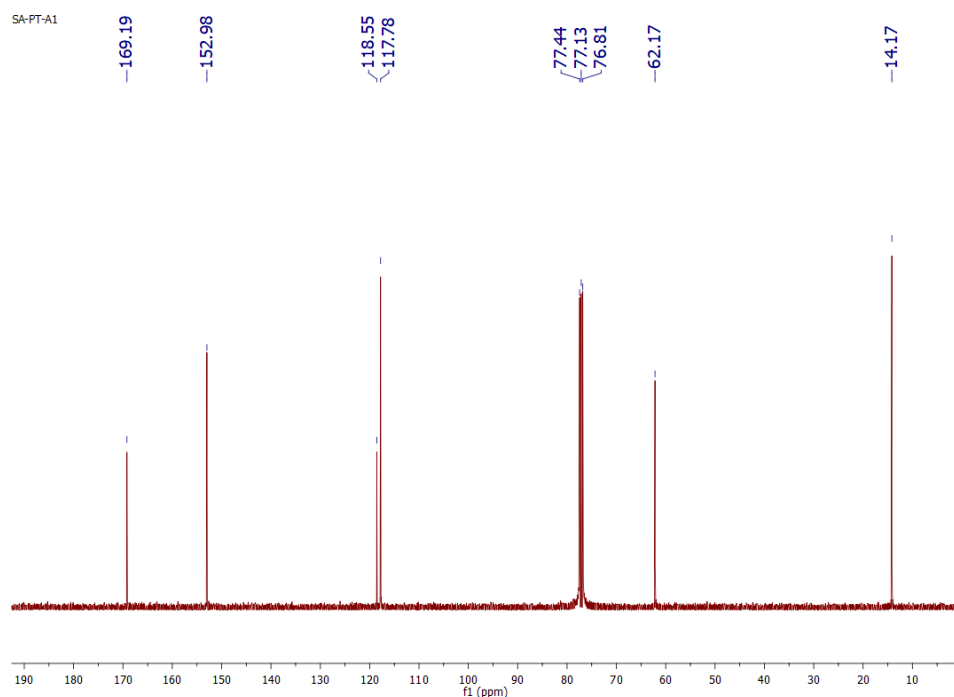

**Figure S4:  $^{13}\text{C}$  NMR spectra of diethyl-2,5-dihydroxyterephthalate**

### Synthesis of 2,5-dihydroxyterephthalohydrazide (DHTH)

A round-bottom flask was charged with diethyl-2,5-dihydroxyterephthalate (0.5 g, 1.96 mmol) and ethanol (20 mL). Hydrazine hydrate (2.5 mL, 51 mmol) was then added to the flask. The mixture was heated to 90 °C for 15 hours. After cooling to room temperature, a pale-yellow precipitate formed. The resulting crude product was collected by filtration, washed with ethanol three times, and dried under vacuum to yield the pure product<sup>2</sup>.

Yield: 0.33 g, 74.5%.  $^1\text{H}$  NMR (400 MHz,  $\text{DMSO-d}_6$ )  $\delta$  11.59 (s, 2H, 2OH), 10.03 (s, 2H, 2NH), 7.31 (s, 2H, Ar-H), 4.64 (s, 4H, 2NH<sub>2</sub>). NMR (101 MHz,  $\text{DMSO-d}_6$ )  $\delta$  166.70, 150.94, 119.55, 115.46.

### 3) Synthesis of DHTH

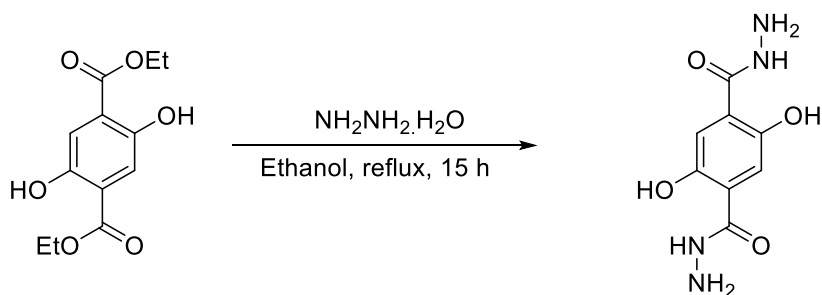

**Scheme 3: Synthesis of 2,5-dihydroxyterephthalohydrazide**

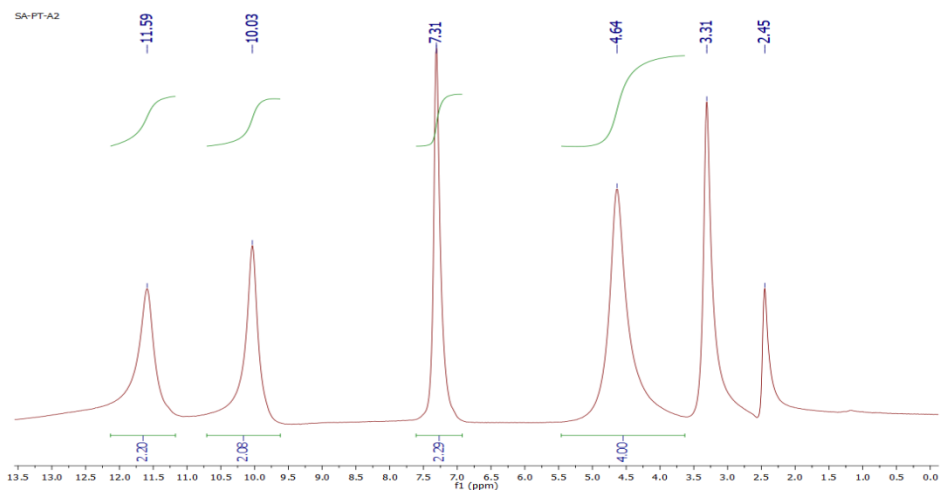

**Figure S5:  $^1\text{H}$  NMR spectra of 2,5-dihydroxyterephthalohydrazide**

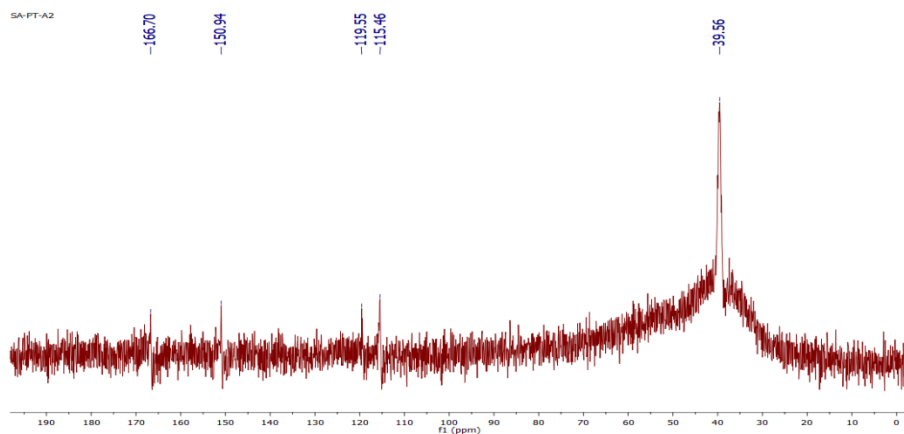

**Figure S6:  $^{13}\text{C}$  NMR spectra of 2,5-dihydroxyterephthalohydrazide**

### Preparation of COF:

A beaker containing 2,5-dihydroxyterephthalate (DHTH) (0.162 g, 0.72 mmol) and 4,4',4''-[1,3,5-triazine-2,4,6-triyltris(oxy)]tris-benzaldehyde (TRIPOD) (0.112 mg, 0.48 mmol) was combined with a solution of 1,4-dioxane (12 mL) and 6.0 M aqueous acetic acid (2 mL). The mixture was then sonicated in an ice water bath for 8 hours. The resulting fluffy yellow solid, which swelled in the solvent system, was collected by filtration. The solid was sequentially washed three times with anhydrous dichloromethane, anhydrous acetone, and tetrahydrofuran, and then activated under vacuum at 120 °C for 8 hours to produce COF (0.28 g)<sup>3</sup>.

#### 4) Synthesis of COF

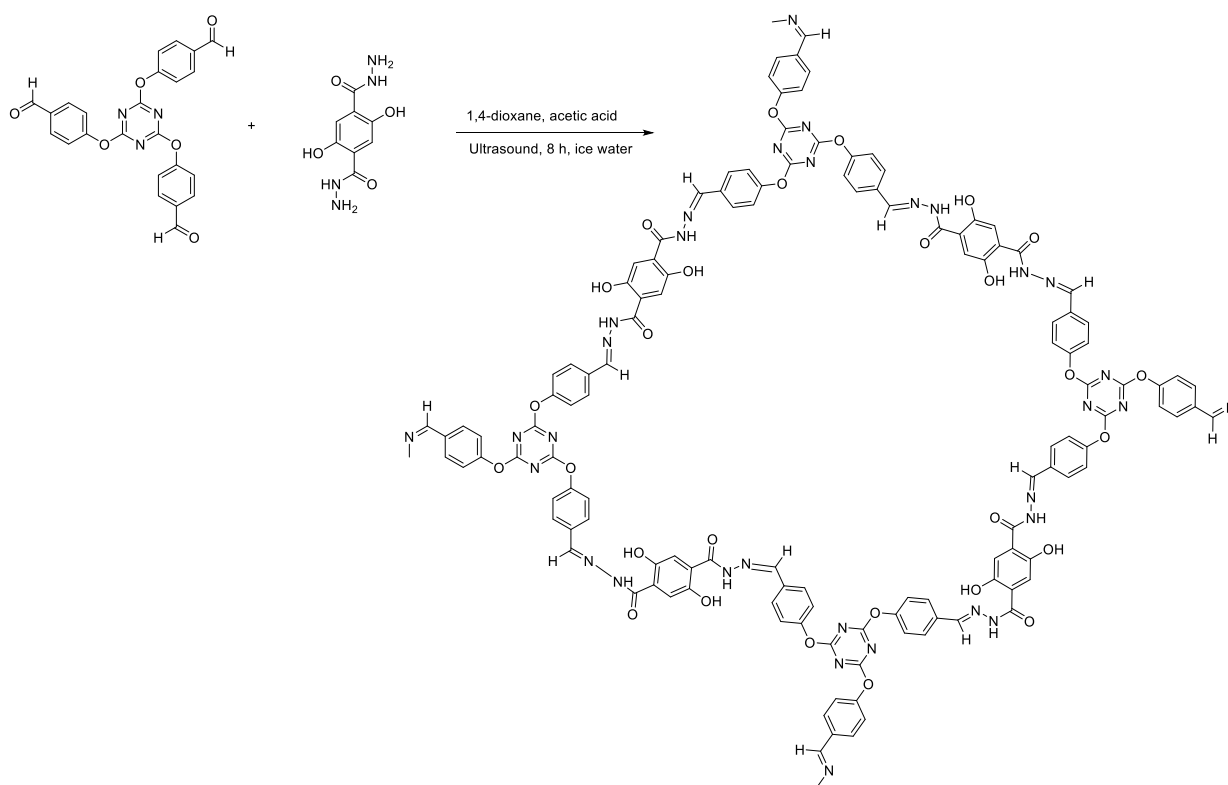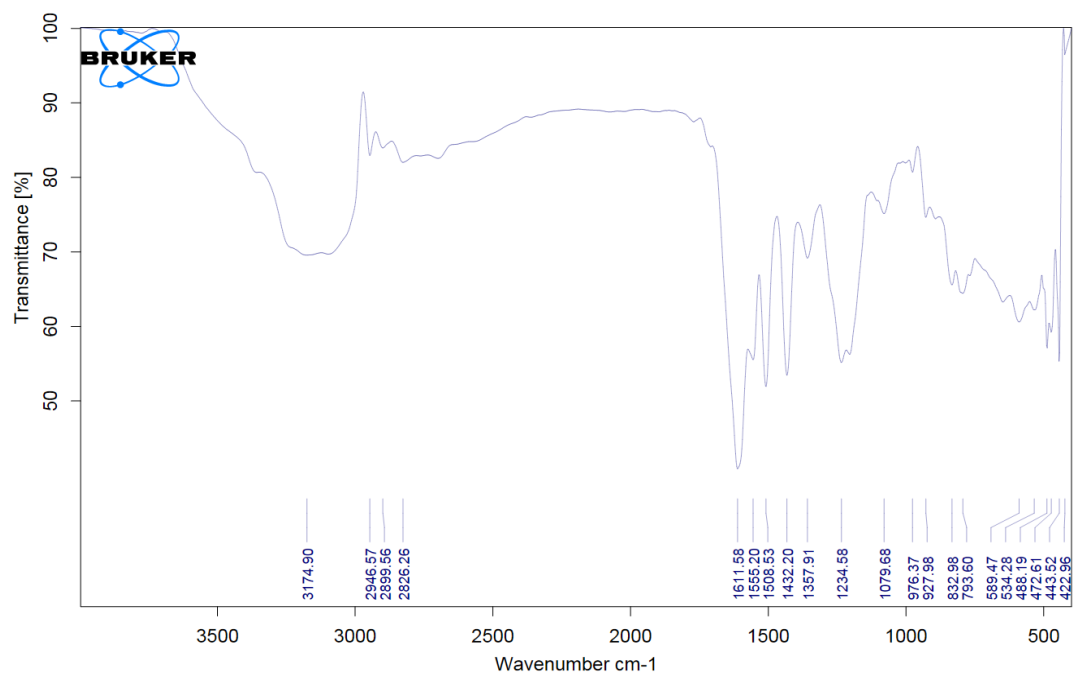

**Figure S7: FT-IR spectrum of COF**

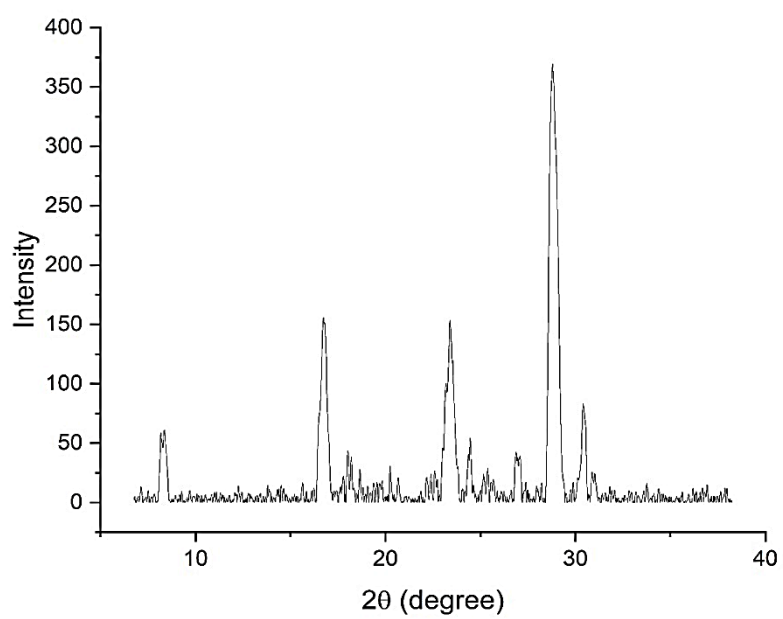

**Figure S8: PXRD image of COF**

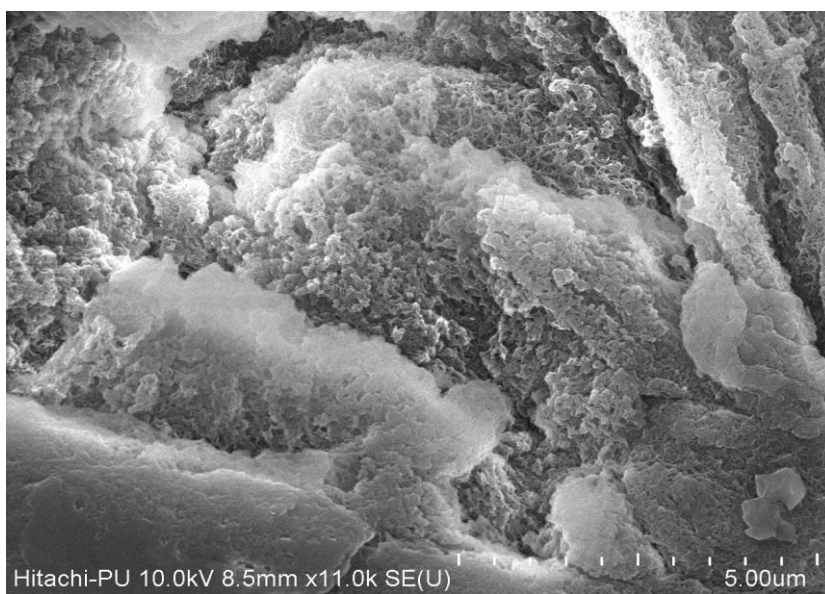

**Figure S9: SEM image of COF**



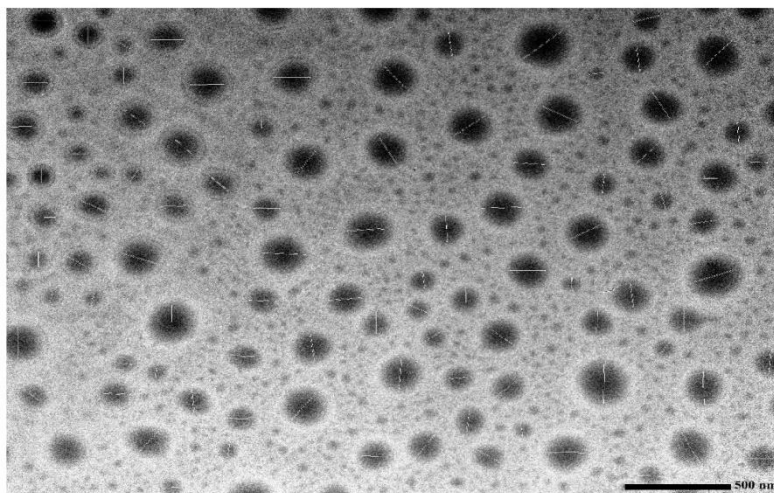

**Figure S10: TEM image of COF**

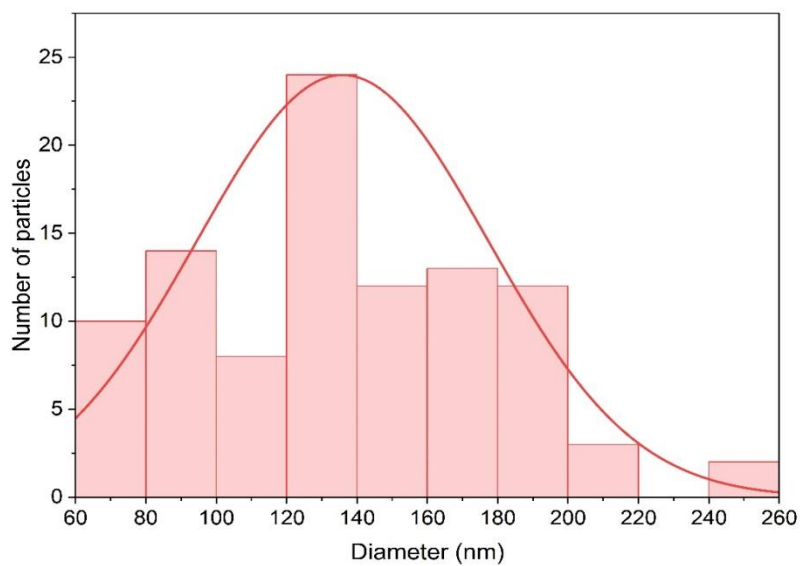

**Figure S11: Histogram of particle size distribution of COF**

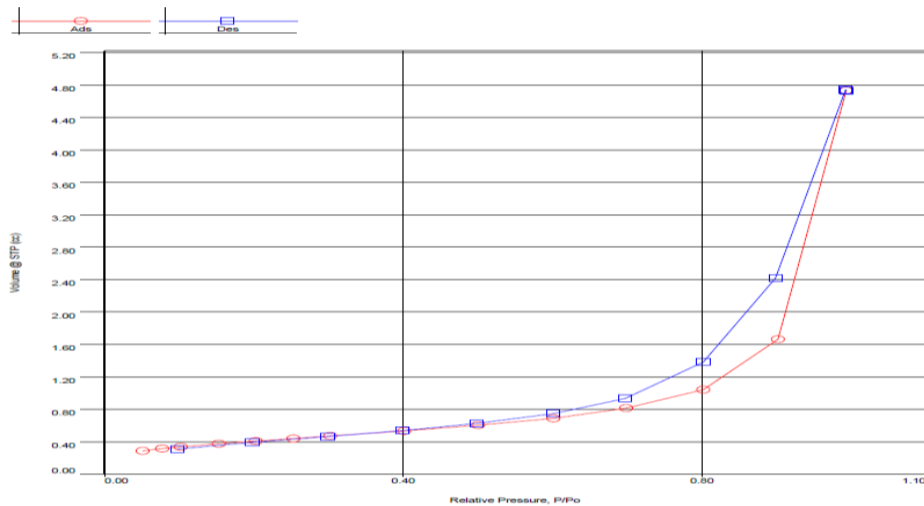

**Figure S12: N<sub>2</sub> adsorption-desorption isotherms of COF**

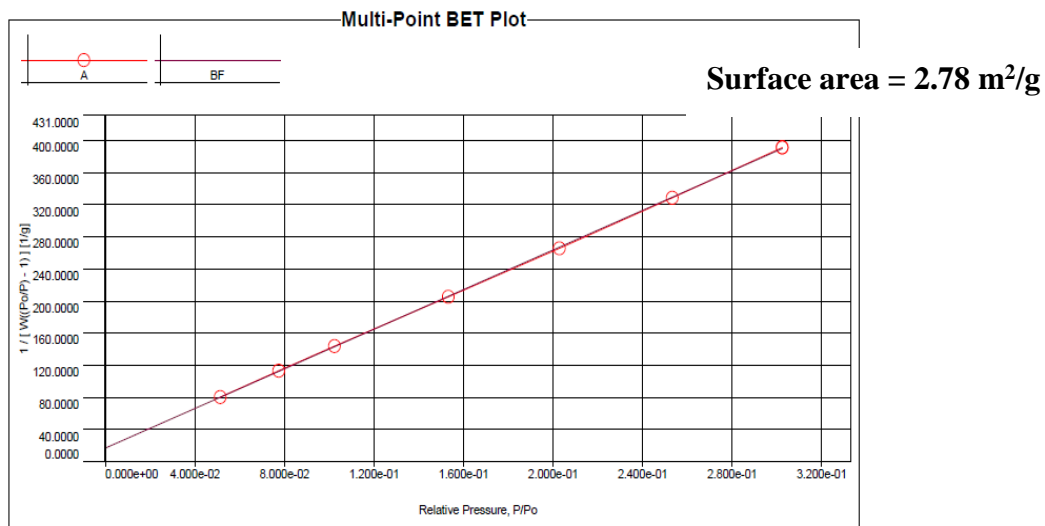

**Figure S13: BET surface area plot for COF calculated from the adsorption data**

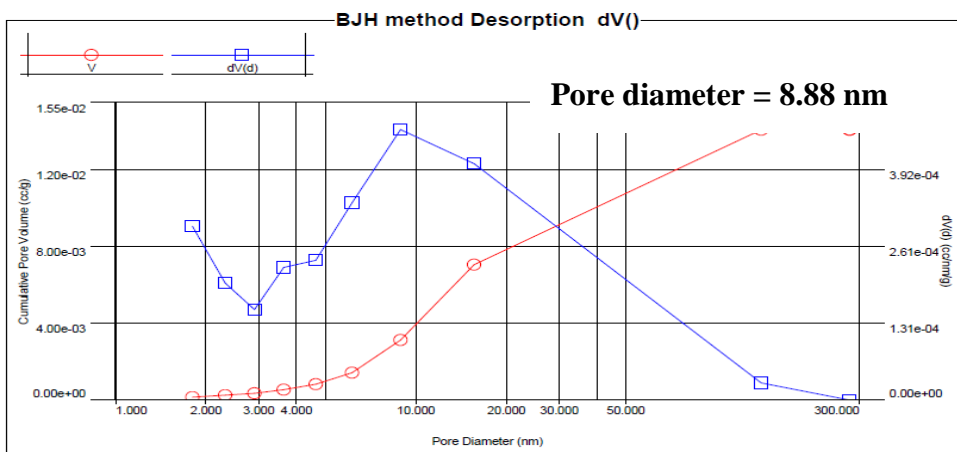

**Figure S14: Average pore diameter calculation through BJH desorption method**

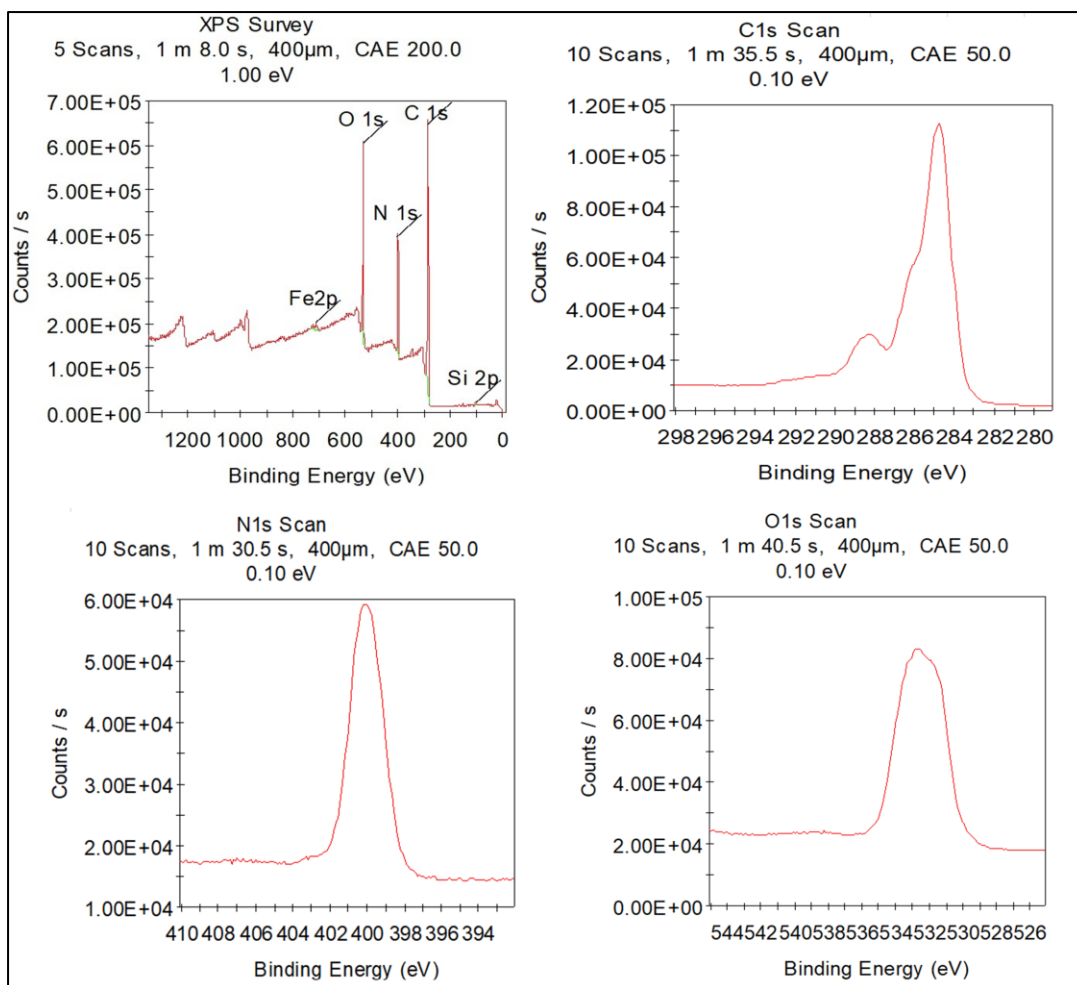

**Figure S15: XPS study of COF**

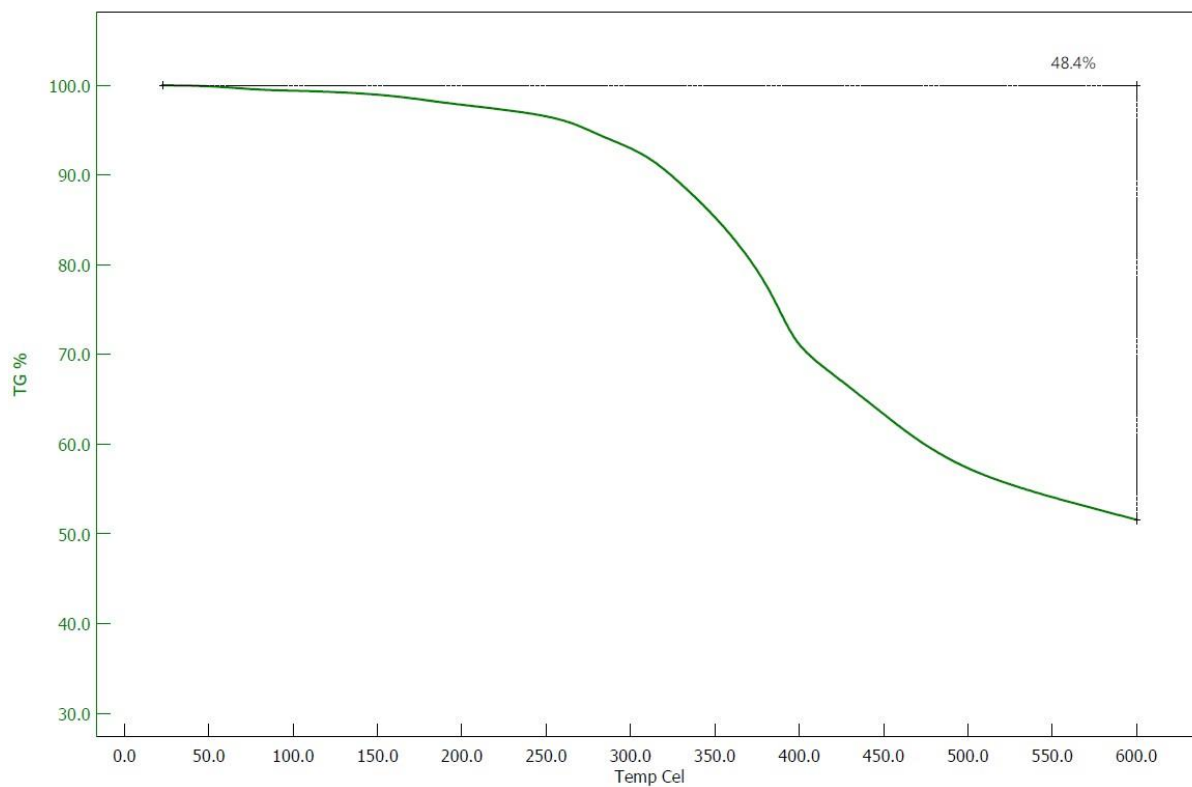

**Figure S16: TGA curve of COF**

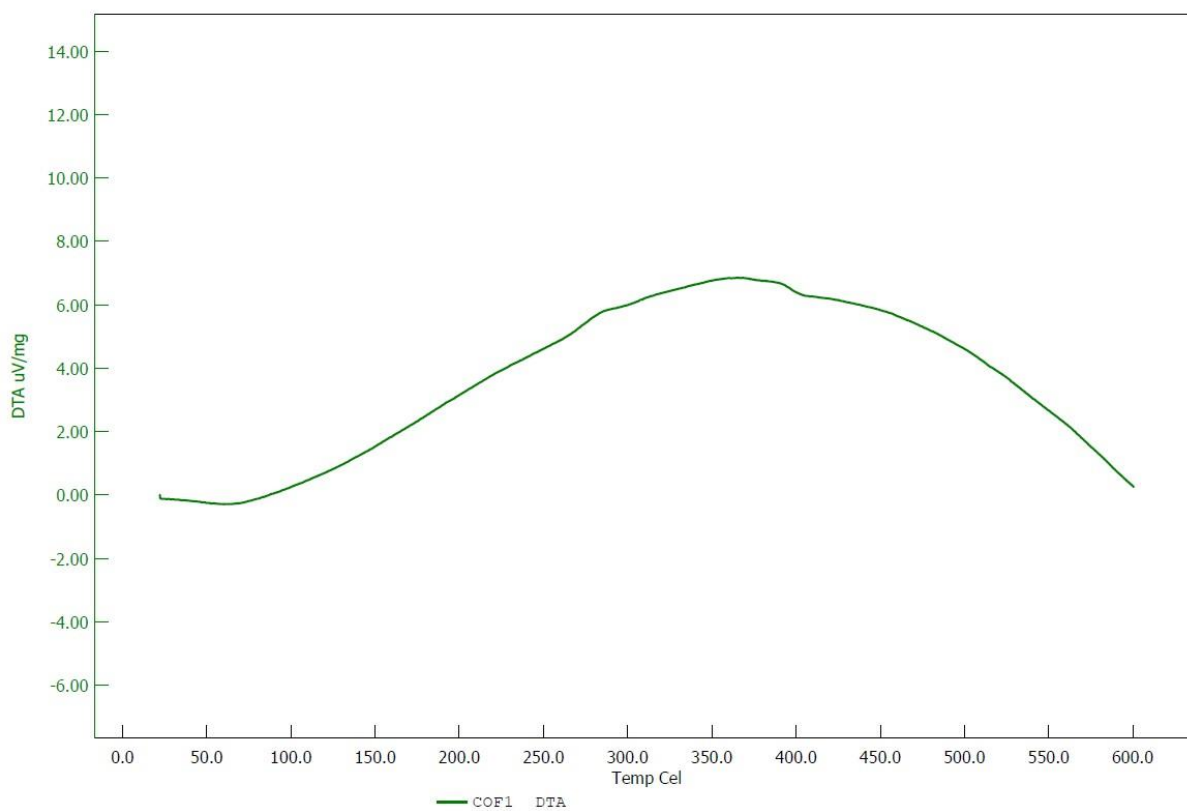

**Figure S17: DTA curve of COF**

**General procedure for the synthesis of triazolidine-3-thione derivatives:**

In a 100 mL round bottom flask, 10 mL of a water: ethanol mixture (1:2) was added to mixture of aromatic aldehyde or ketone (1.0 mmol), thiosemicarbazide (1.0 mmol), and COF (20 mg) at room temperature. The reaction progress was monitored using TLC. Upon completion, additional ethanol was added to dissolve the organic product, and the solid catalyst was separated by filtration. The final product was obtained by evaporating the ethanol under vacuum. The reaction products were characterized and confirmed using FT-IR,  $^1\text{H-NMR}$ ,  $^{13}\text{C-NMR}$ , and mass spectroscopy.

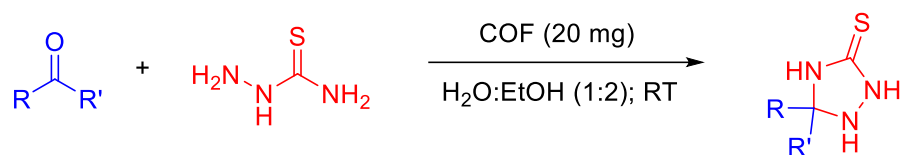

**Figure S18: General reaction for synthesis of triazolidine-3-thione derivatives**

**Spectra of synthesized derivatives:**

*5-(4-nitrophenyl)-1,2,4-triazolidine-3-thione (3a):*

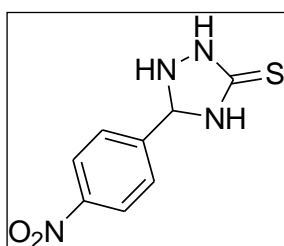

98% yield; m.p. 208-210 °C<sup>4</sup>;  $^1\text{H NMR}$  (400 MHz, DMSO  $d_6$ ):  $\delta$  11.70 (s, 1H, NH), 8.40 (s, 1H, NH), 8.25 (s, 1H, NH), 8.19 (s, 1H, Ar-H), 8.17 (s, 1H, Ar-H), 8.07 (d,  $J = 3.0$  Hz, 2H, Ar-H), 8.05 (s, CH);  $^{13}\text{C NMR}$  (101 MHz, DMSO  $d_6$ ):  $\delta$  178.94, 148.08, 141.28, 140.02, 128.71, 124.33.

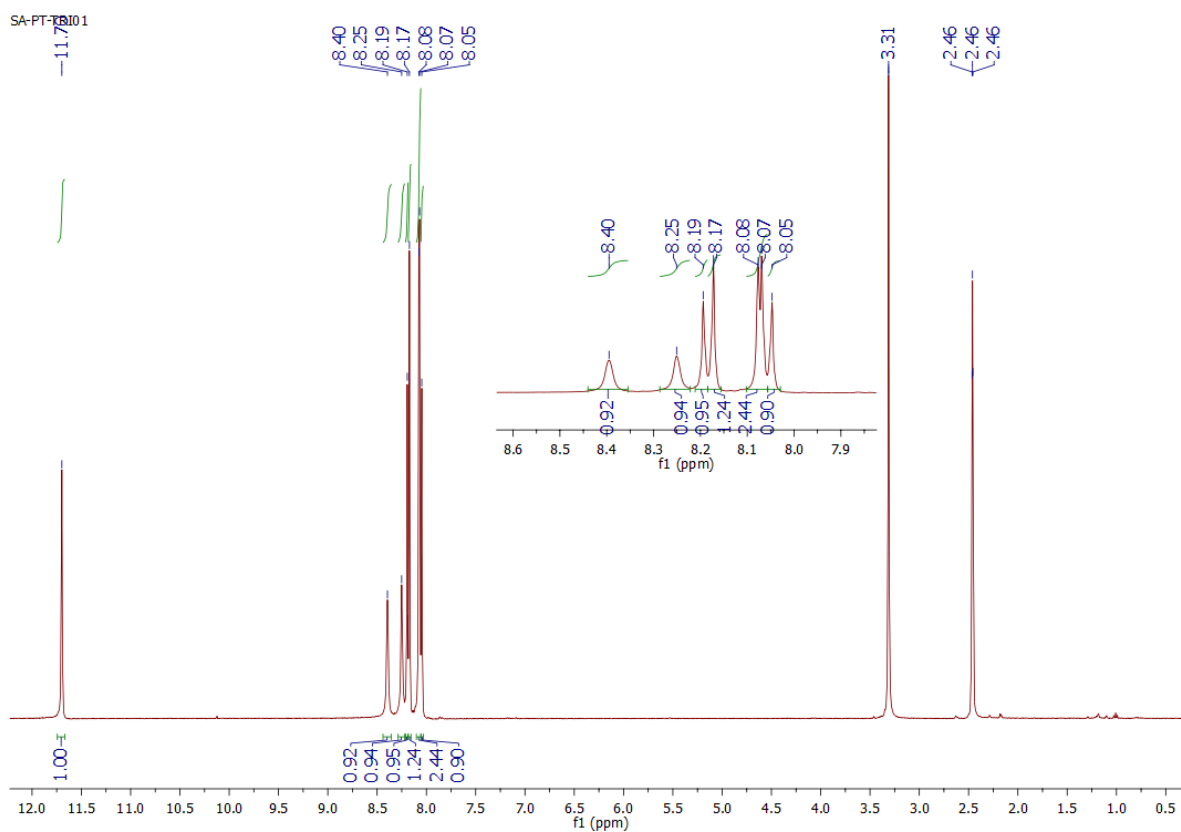

**Figure S19:**  $^1\text{H}$  NMR of synthesized compound 3a

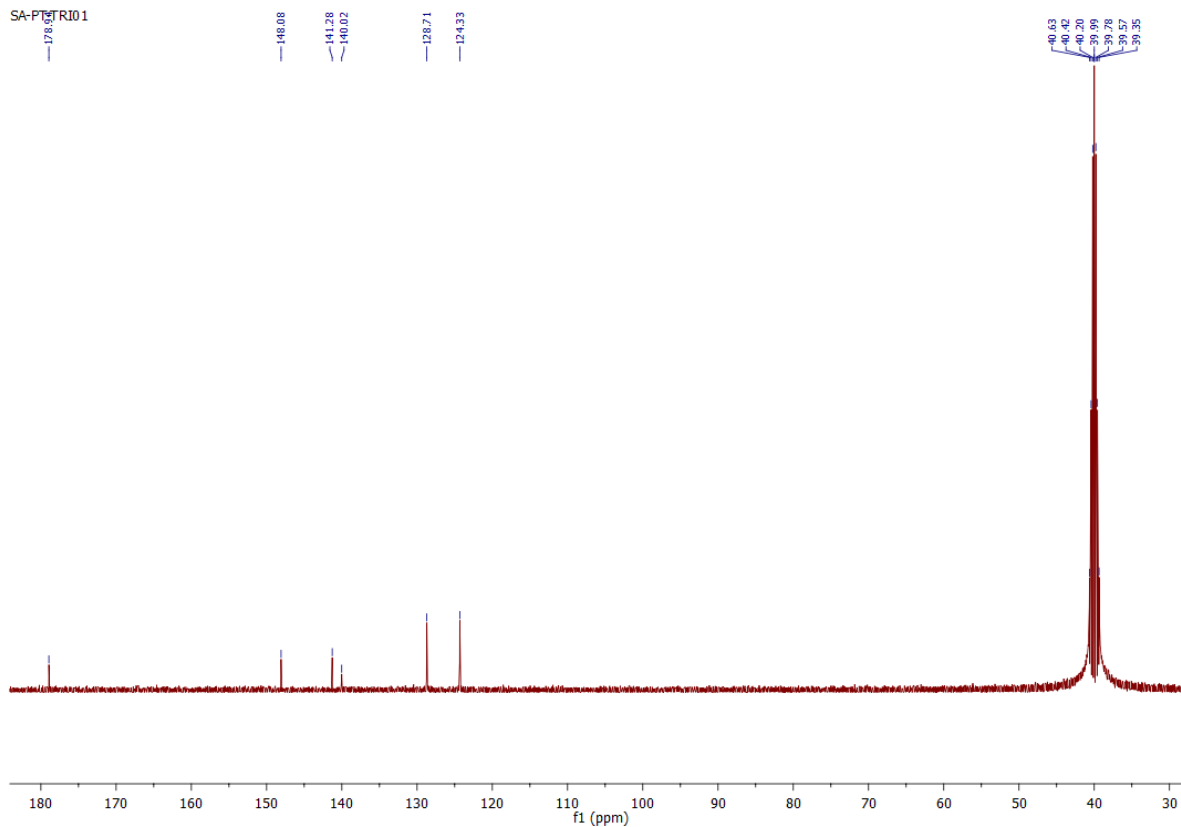

**Figure S20:**  $^{13}\text{C}$  NMR of synthesized compound 3a

5-(3,4,5-trimethoxyphenyl)-1,2,4-triazolidine-3-thione (**3b**):

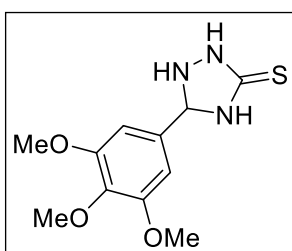

95% yield; m.p. 215-217 °C;  $^1\text{H}$  NMR (400 MHz, DMSO  $d_6$ ):  $\delta$  11.29 (s, 1H, NH), 8.22 (s, 1H, Ar-H), 8.10 (s, 1H, NH), 7.88 (s, 1H, NH), 7.80 (d,  $J = 8.9$  Hz, 1H, Ar-H), 6.81 (d,  $J = 9.0$  Hz, 1H, CH), 3.79 (s, 3H,  $\text{CH}_3\text{O}$ ), 3.74 (s, 3H,  $\text{CH}_3\text{O}$ ), 3.71 (s, 3H,  $\text{CH}_3\text{O}$ );  $^{13}\text{C}$  NMR (101 MHz, DMSO  $d_6$ ):  $\delta$  178.00, 155.47, 153.21, 141.94, 138.73, 121.62, 120.84, 109.09, 62.36, 61.00, 56.52.

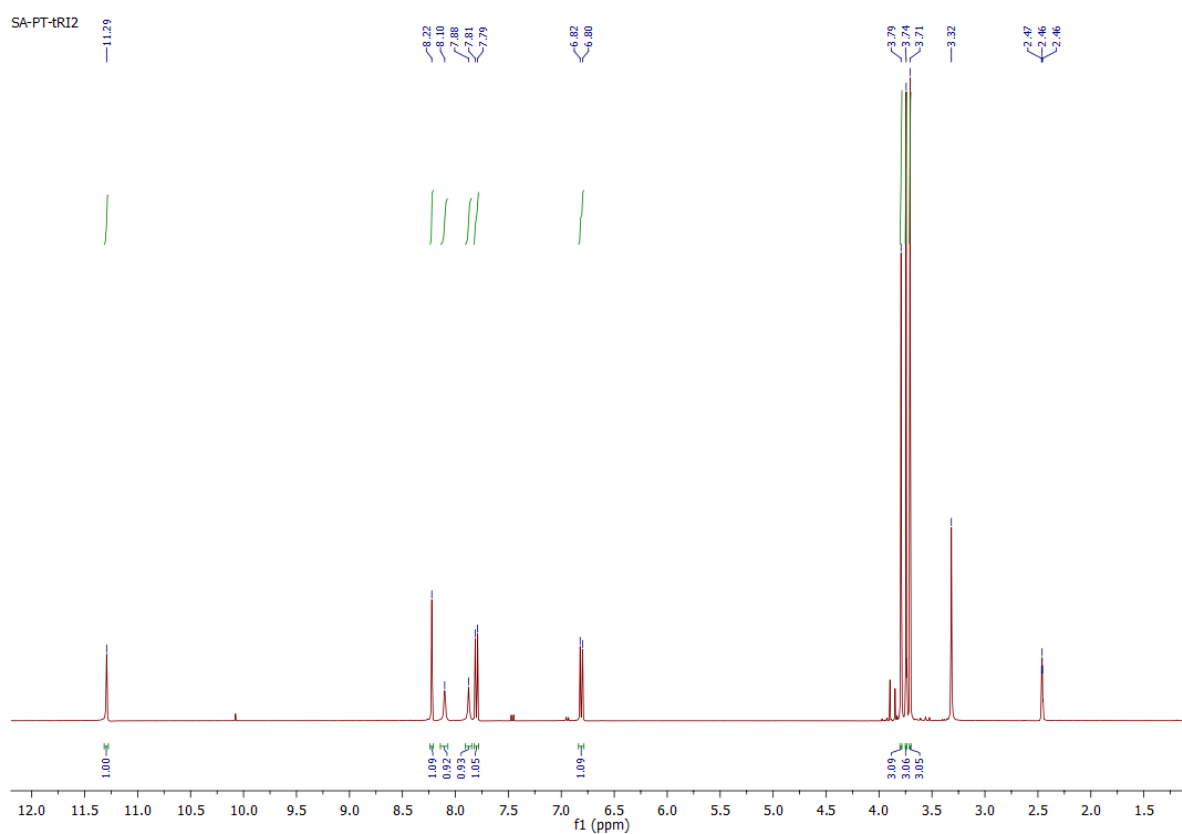

Figure S21:  $^1\text{H}$  NMR of synthesized compound **3b**

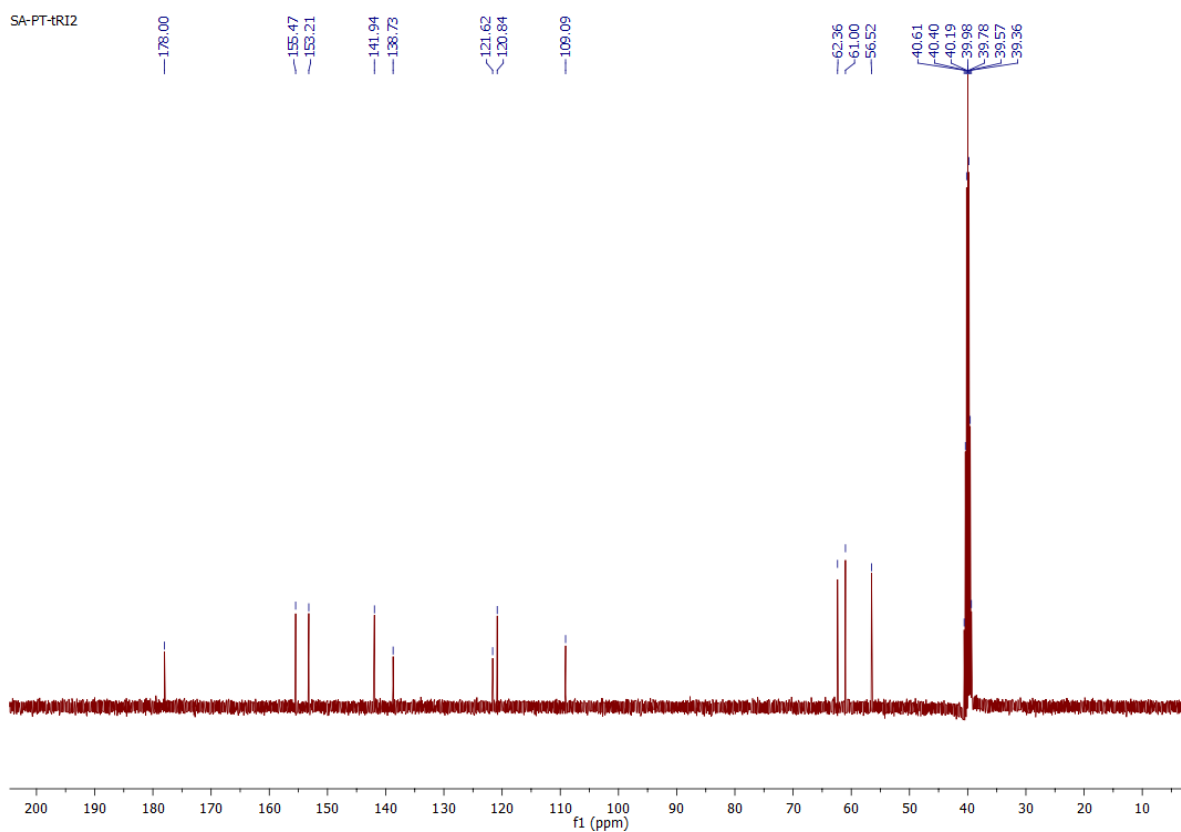

**Figure S22:**  $^{13}\text{C}$  NMR of synthesized compound **3b**

*5-(4-methylthiazol-2-yl)-1,2,4-triazolidine-3-thione (3c):*

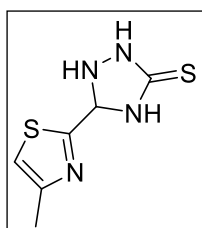

94% yield; m.p. 221-224 °C;  $^1\text{H}$  NMR (400 MHz, DMSO  $d_6$ )  $\delta$  11.38 (s, 1H, NH), 9.00 (s, 1H, Ar-H), 8.31 (s, 1H, CH), 8.23 (s, 1H, NH), 7.60 (s, 1H, NH), 2.39 (s, 3H,  $\text{CH}_3$  of thiazole ring).  $^{13}\text{C}$  NMR (101 MHz, DMSO  $d_6$ )  $\delta$  177.98, 155.47, 154.72, 136.22, 127.82, 15.87.



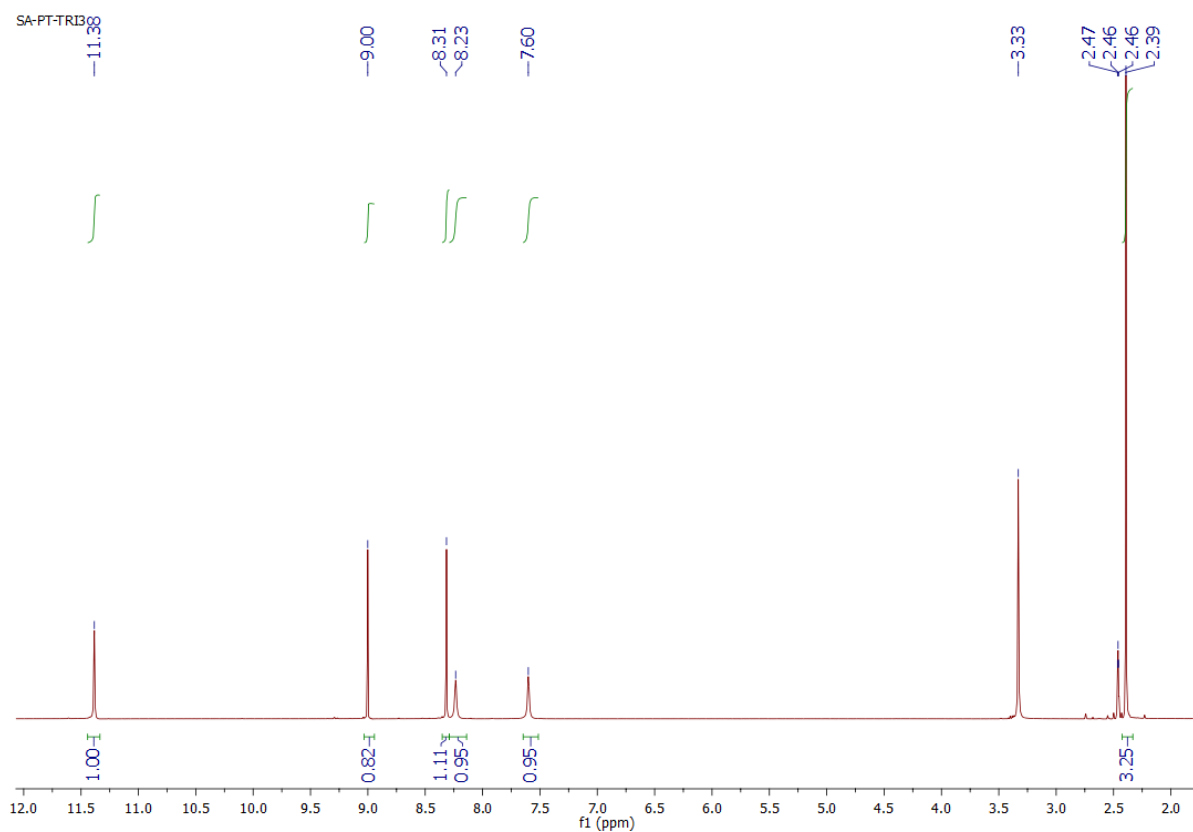

Figure S23:  $^1\text{H}$  NMR of synthesized compound 3c

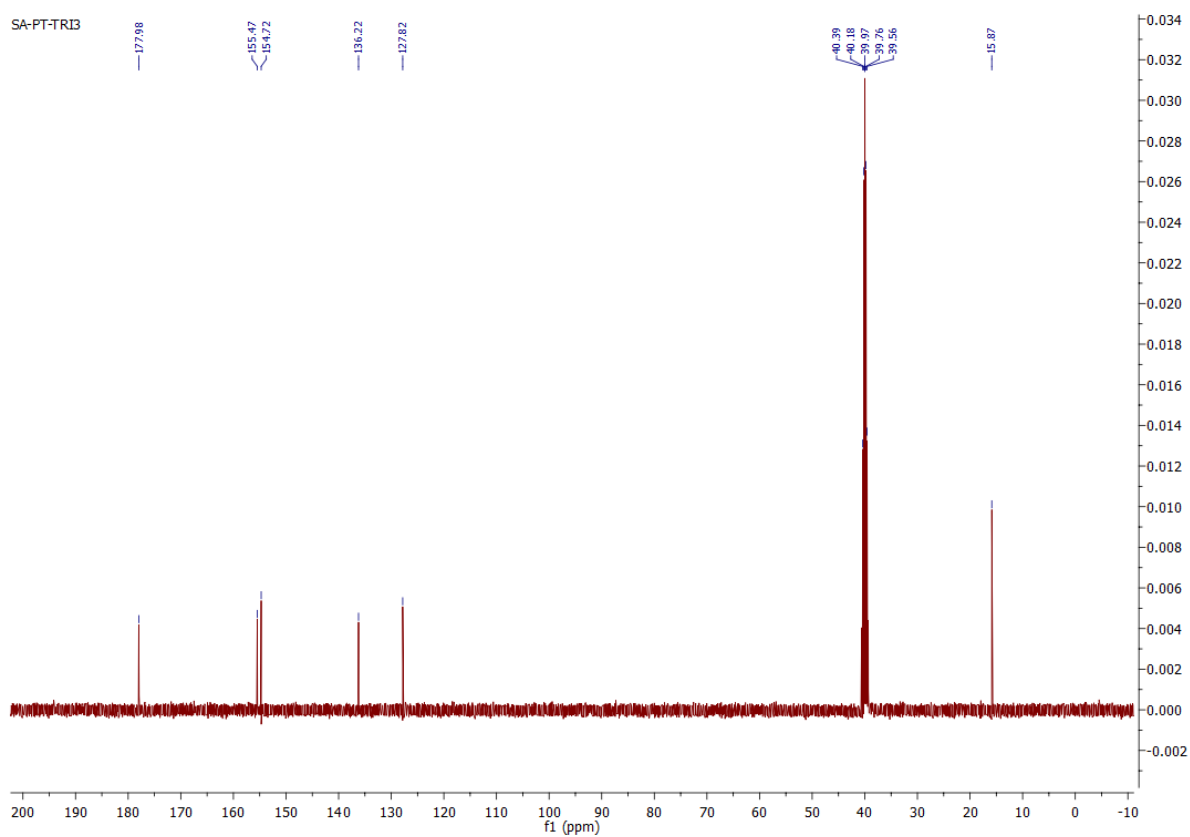

Figure S24:  $^{13}\text{C}$  NMR of synthesized compound 3c

5-(pyridin-2-yl)-1,2,4-triazolidine-3-thione (**3d**):

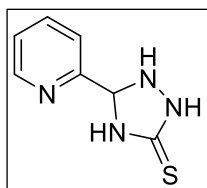

90% yield; m.p. 180-184 °C<sup>4</sup>; <sup>1</sup>H NMR (400 MHz, DMSO d<sub>6</sub>) δ 11.61 (s, 1H, NH), 8.52 – 8.50 (m, 1H, Ar-H), 8.33 (s, 1H, NH), 8.24 (d, J = 8.0 Hz, 1H, Ar-H), 8.15 (s, 1H, NH), 8.04 (s, 1H, CH), 7.81 – 7.74 (m, 1H, Ar-H), 7.34 – 7.31 (m, 1H, NH), <sup>13</sup>C NMR (101 MHz, DMSO d<sub>6</sub>) δ 178.79, 153.82, 149.81, 143.00, 137.08, 124.64, 120.75.

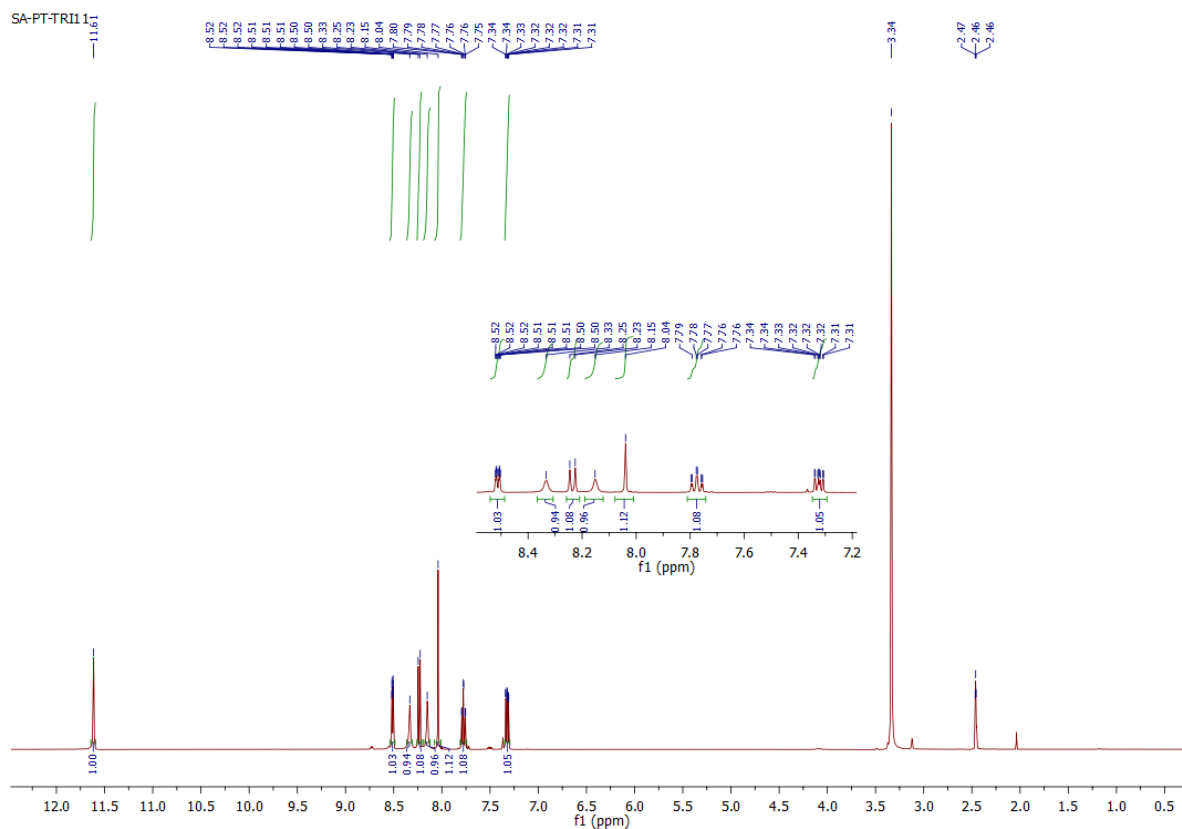

Figure S25: <sup>1</sup>H NMR of synthesized compound **3d**

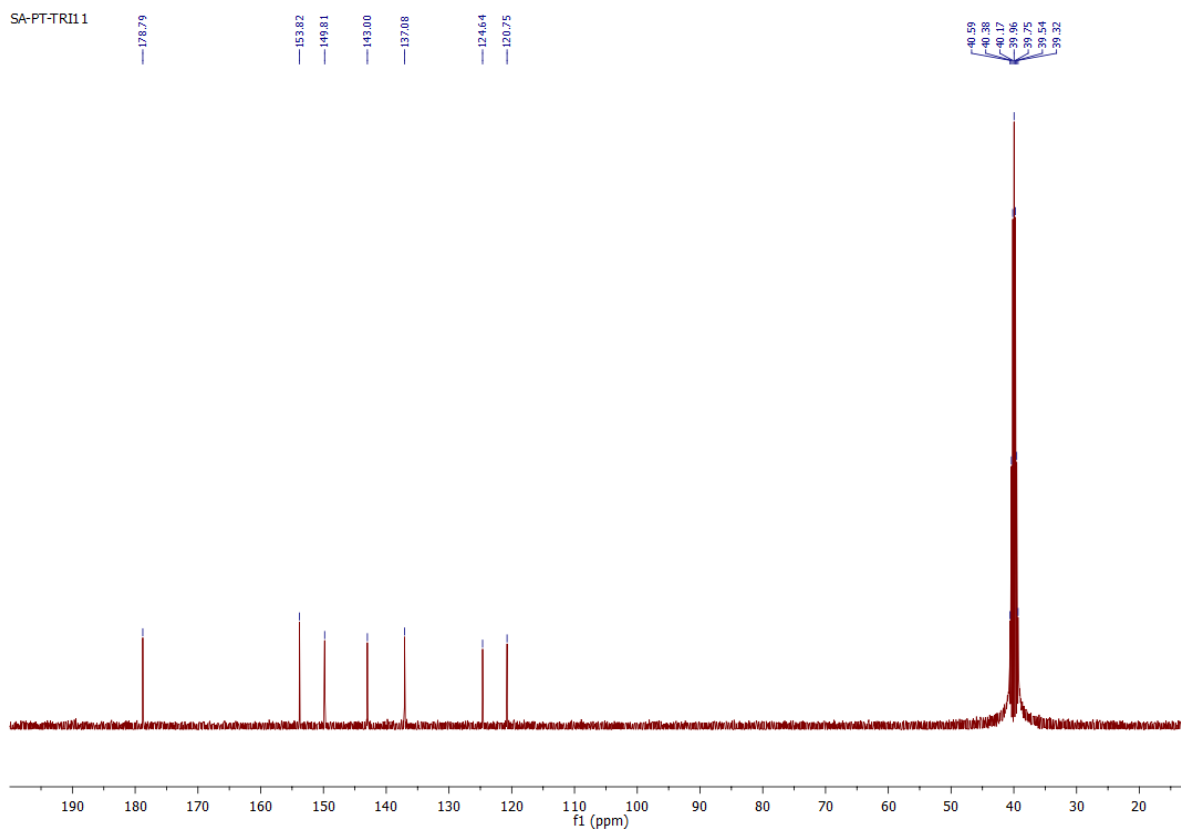

**Figure S26:**  $^{13}\text{C}$  NMR of synthesized compound **3d**

*(E)*-5-styryl-1,2,4-triazolidine-3-thione (**3e**):

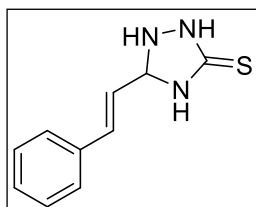

92% yield; m.p. 115-120 °C<sup>5</sup>;  $^1\text{H}$ -NMR (400 MHz, DMSO  $d_6$ )  $\delta$  11.39 (s, 1H, NH), 8.18 (s, 1H, NH), 7.85 (d,  $J = 9.2$  Hz, 1H, CH), 7.60 (s, 1H, NH), 7.51 (d,  $J = 7.3$  Hz, 2H, Ar-H), 7.34 (t,  $J = 7.3$  Hz, 2H, Ar-H), 7.29-7.26 (m, 1H, Ar-H), 6.98 (d,  $J = 16.3$  Hz, 1H, CH (CH=CH)), 6.82 (dd,  $J = 16.2, 9.3$  Hz, 1H, CH=CH);  $^{13}\text{C}$  NMR (101 MHz, DMSO  $d_6$ )  $\delta$  178.13, 145.21, 139.39, 136.39, 129.42, 129.38, 127.46, 125.56.

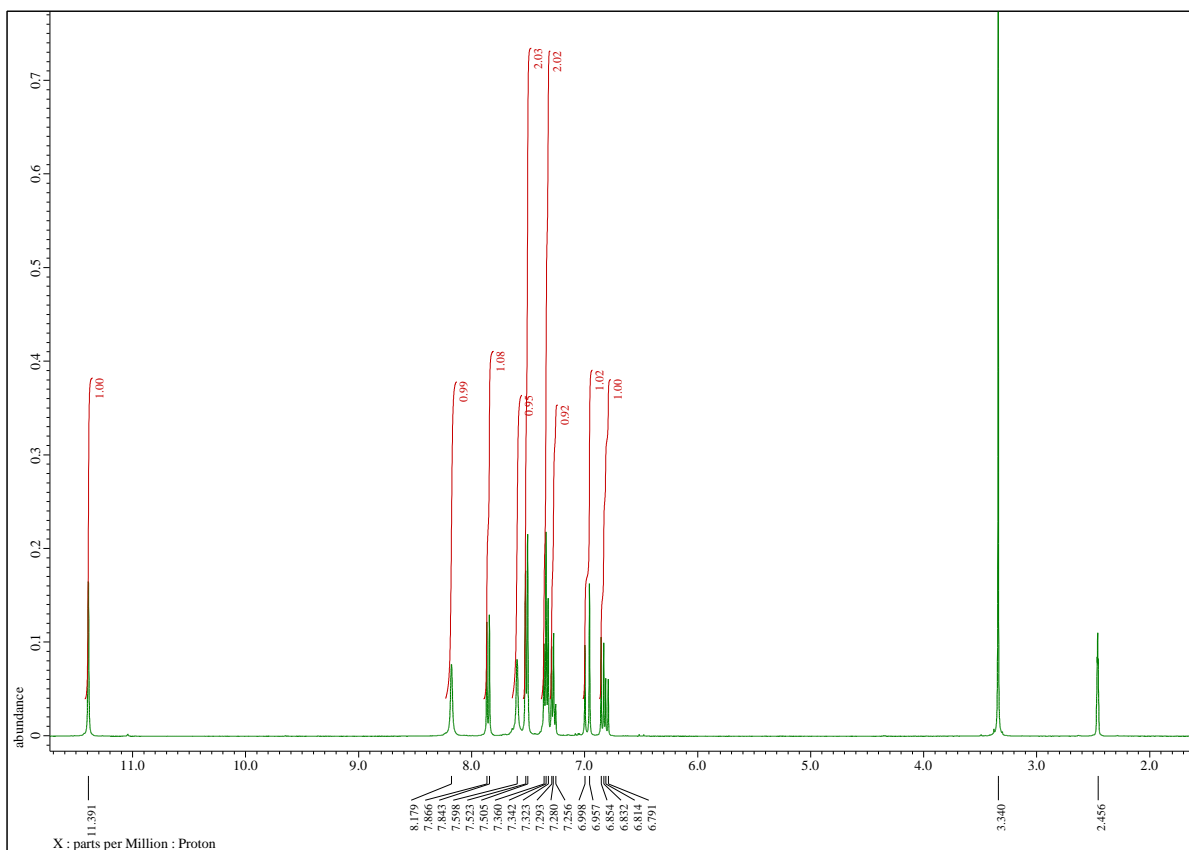

Figure S27:  $^1\text{H}$  NMR of synthesized compound 3e

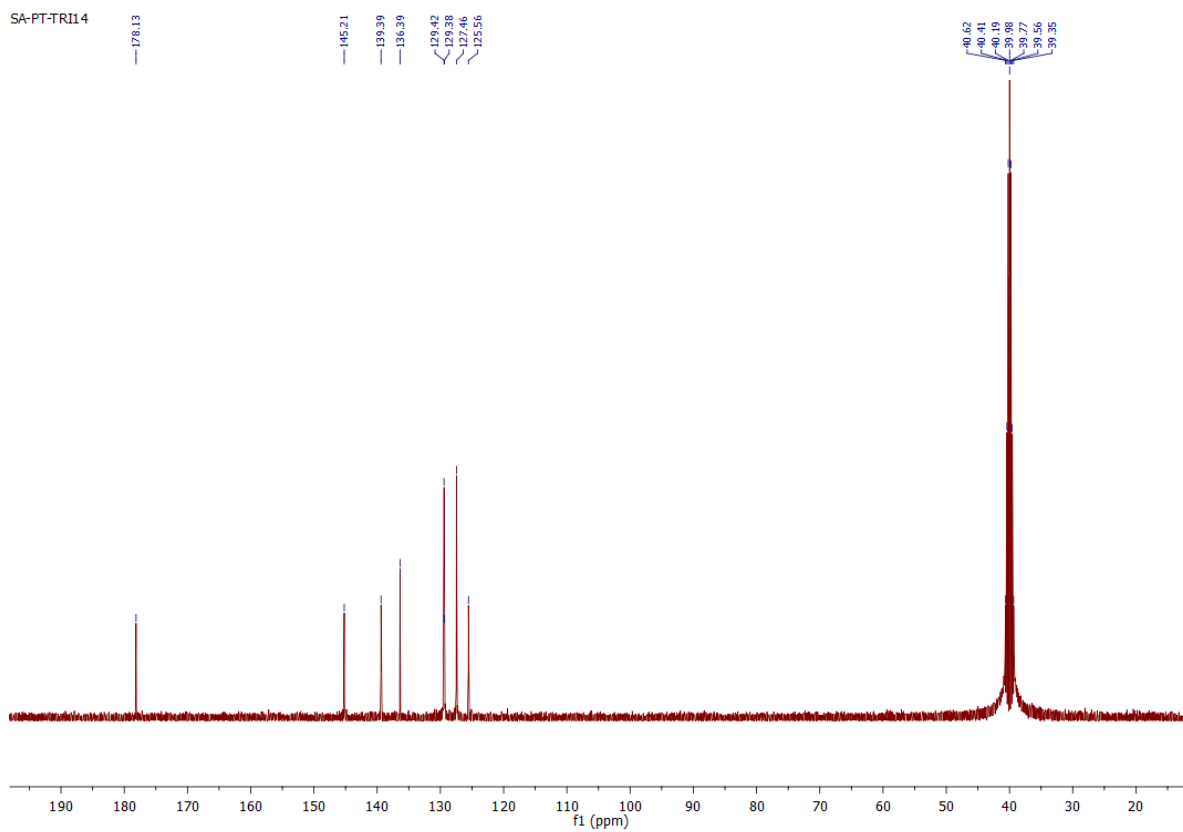

Figure S28:  $^{13}\text{C}$  NMR of synthesized compound 3e

5-(anthracen-9-yl)-1,2,4-triazolidine-3-thione (**3f**):

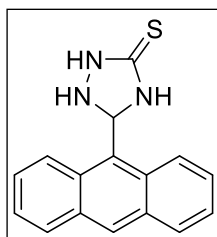

94% yield; m.p. 223-226 °C<sup>6</sup>; <sup>1</sup>H NMR (400 MHz, DMSO d<sub>6</sub>) δ 11.64 (s, 1H, NH), 9.29 (s, 1H, Ar-H), 8.66 (s, 1H, C-H), 8.56 – 8.49 (m, 2H, Ar-H), 8.33 (s, 1H, NH), 8.10 (d, J = 8.3 Hz, 2H, Ar-H), 7.72 (s, 1H, NH), 7.63 – 7.57 (m, 2H, Ar-H), 7.56 – 7.50 (m, 2H, Ar-H); <sup>13</sup>C NMR (101 MHz, DMSO d<sub>6</sub>) δ 178.48, 142.67, 131.38, 130.14, 129.98, 129.49, 127.86, 126.12, 125.49, 125.31.

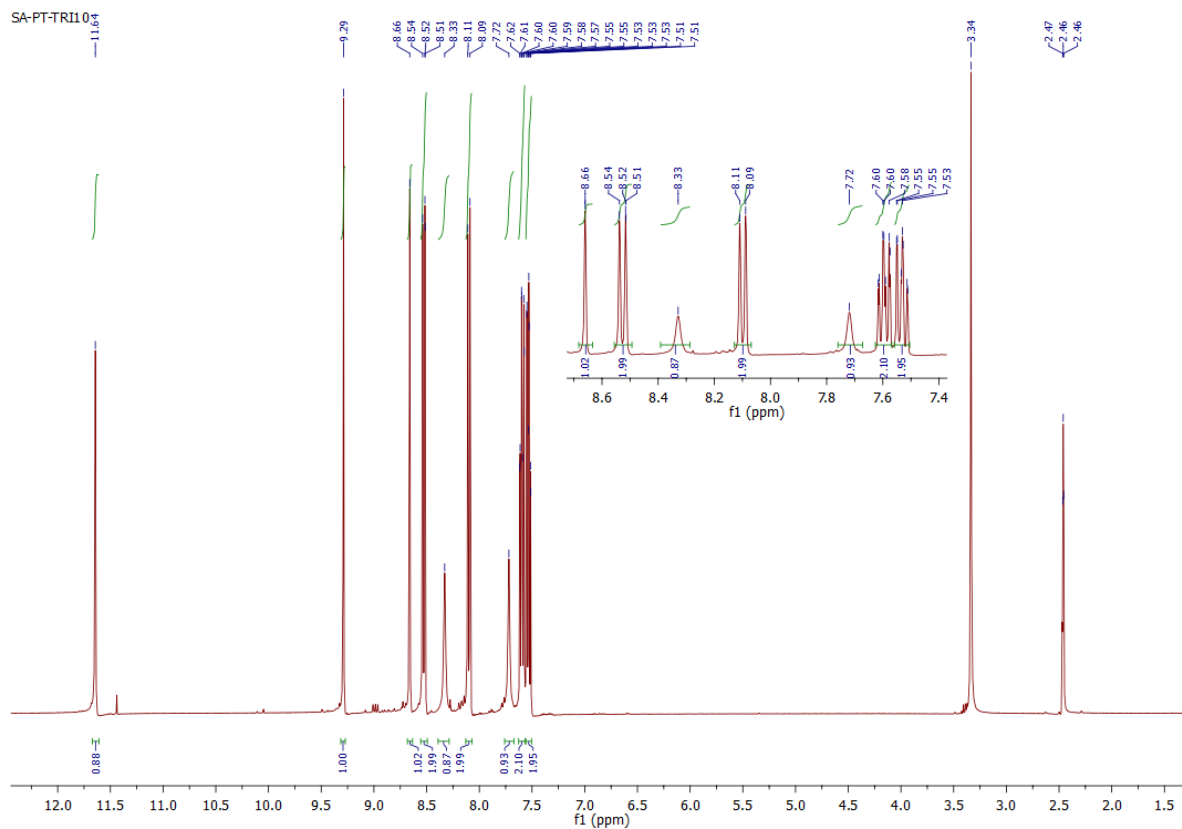

Figure S29: <sup>1</sup>H NMR of synthesized compound **3f**

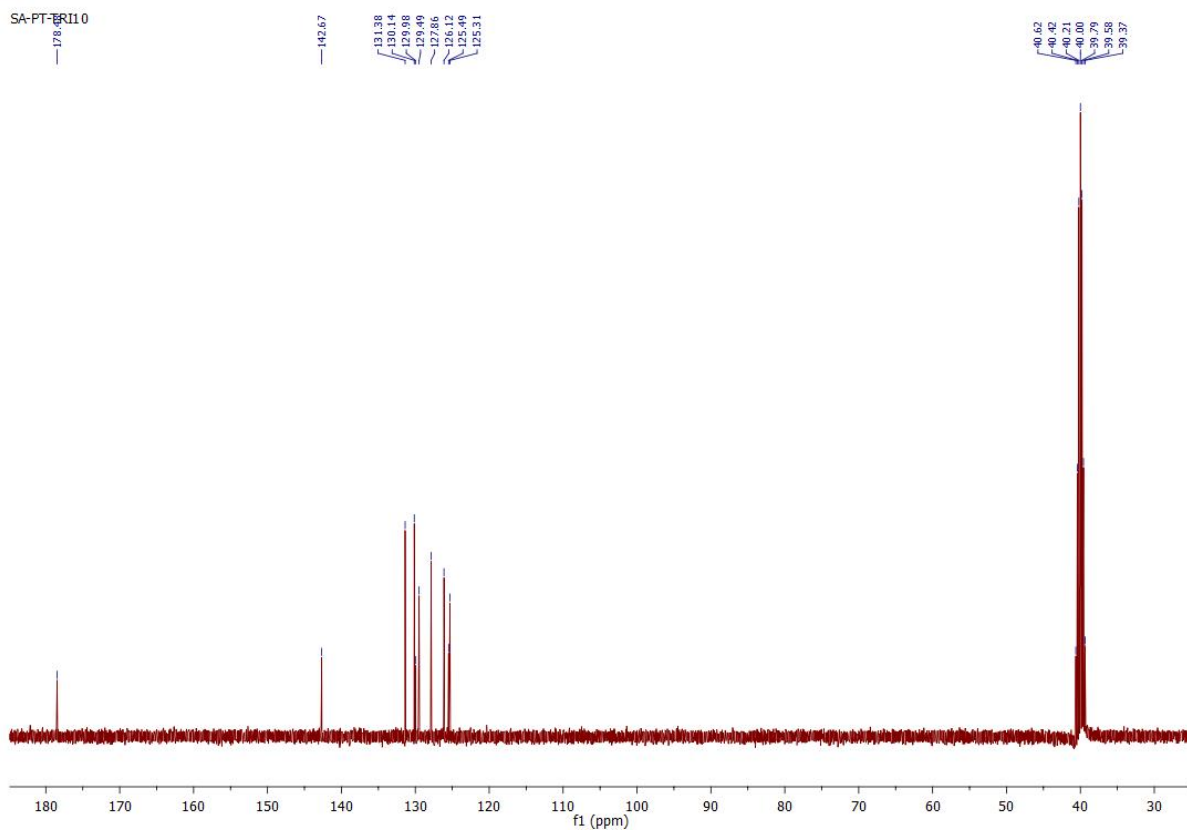

**Figure S30:**  $^{13}\text{C}$  NMR of synthesized compound **3f**

*5-(pyren-1-yl)-1,2,4-triazolidine-3-thione (3g):*

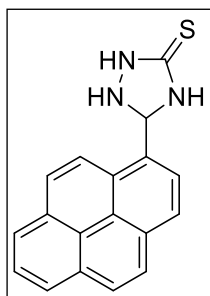

90% yield; m.p. 255-259 °C<sup>6</sup>;  $^1\text{H}$  NMR (400 MHz, DMSO  $d_6$ )  $\delta$  11.56 (s, 1H, NH), 9.23 (s, 1H, NH), 8.86 (d,  $J = 8.2$  Hz, 1H, Ar-H), 8.42 (d,  $J = 9.5$  Hz, 1H, C-H), 8.35 (s, 1H, NH), 8.32 – 8.25 (m, 4H, Ar-H), 8.22 – 8.16 (m, 3H, Ar-H), 8.09 – 8.04 (m, 1H, Ar-H);  $^{13}\text{C}$  NMR (101 MHz, DMSO  $d_6$ )  $\delta$  178.33, 140.71, 132.31, 131.39, 130.65, 129.24, 129.21, 128.76, 127.98, 127.43, 127.11, 126.57, 126.24, 125.71, 124.72, 124.54, 124.35, 122.12.

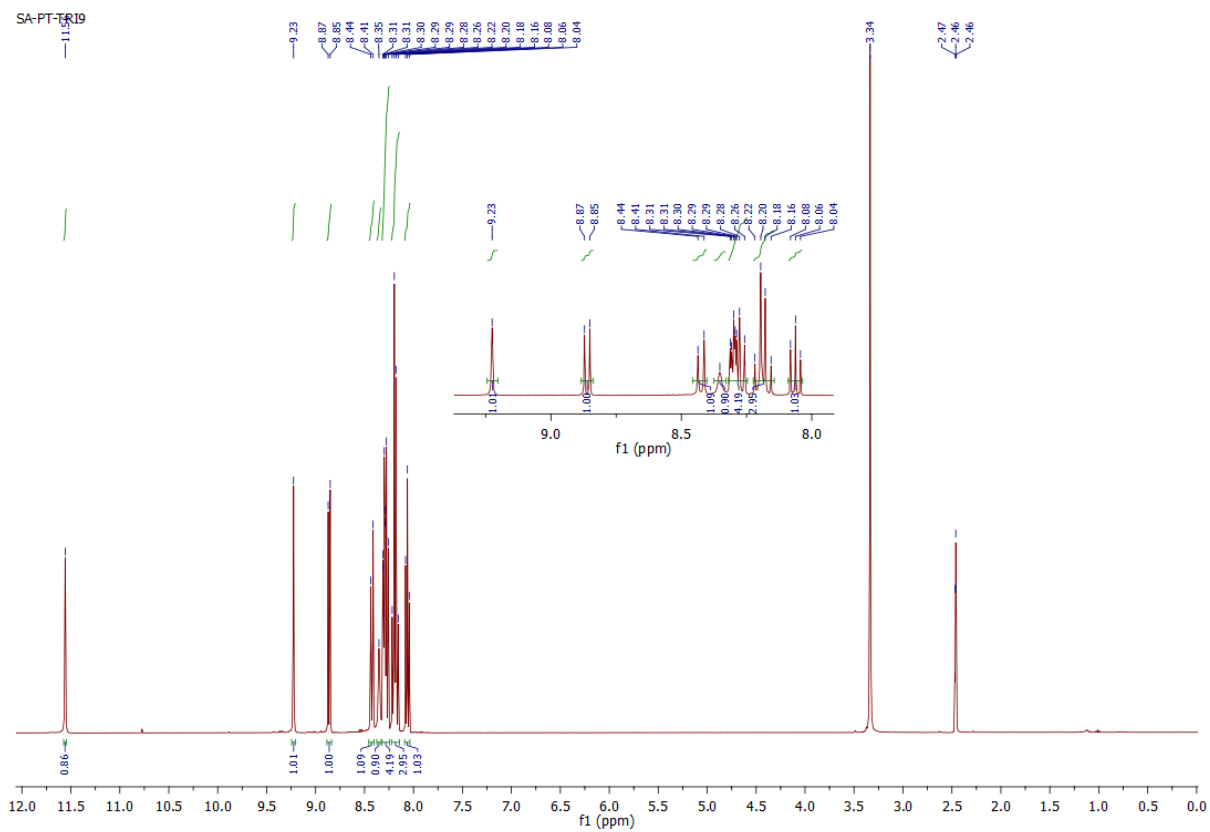

Figure S31:  $^1\text{H}$  NMR of synthesized compound **3g**

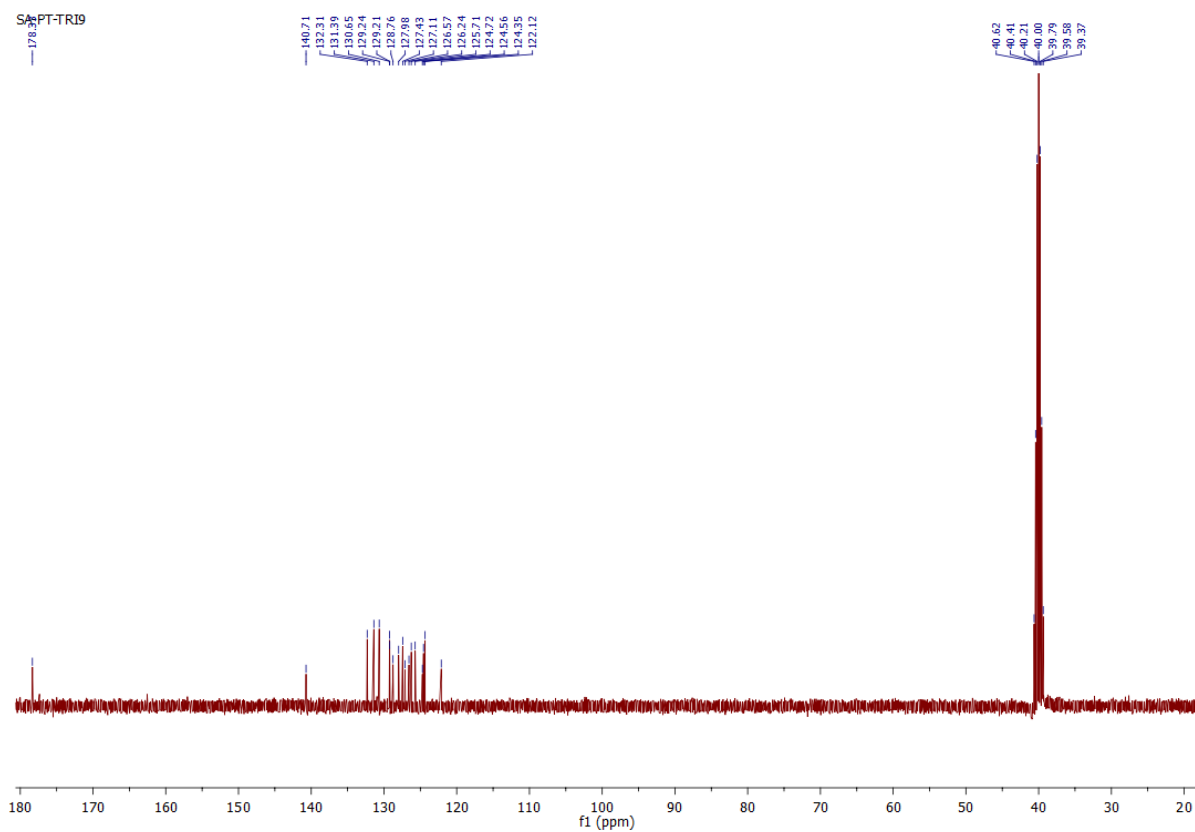

Figure S32:  $^{13}\text{C}$  NMR of synthesized compound **3g**

**5-methyl-5-(3-nitrophenyl)-1,2,4-triazolidine-3-thione (3h):**

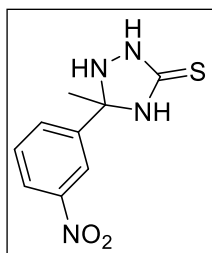

88% yield; m.p. 206-210 °C<sup>7</sup>; <sup>1</sup>H NMR (400 MHz, DMSO d<sub>6</sub>) δ 10.40 (s, 1H, NH), 8.57 (t, J = 1.9 Hz, 1H, NH), 8.41 (s, 1H, NH), 8.39 (d, J = 0.9 Hz, 1H, Ar-H), 8.20 – 8.12 (m, 2H, Ar-H), 7.62 (t, J = 8.0 Hz, 1H, Ar-H), 2.32 (s, 3H, CH<sub>3</sub>). <sup>13</sup>C NMR (101 MHz, DMSO d<sub>6</sub>) δ 179.64, 148.69, 146.09, 139.98, 133.51, 130.23, 124.14, 121.56, 14.61.

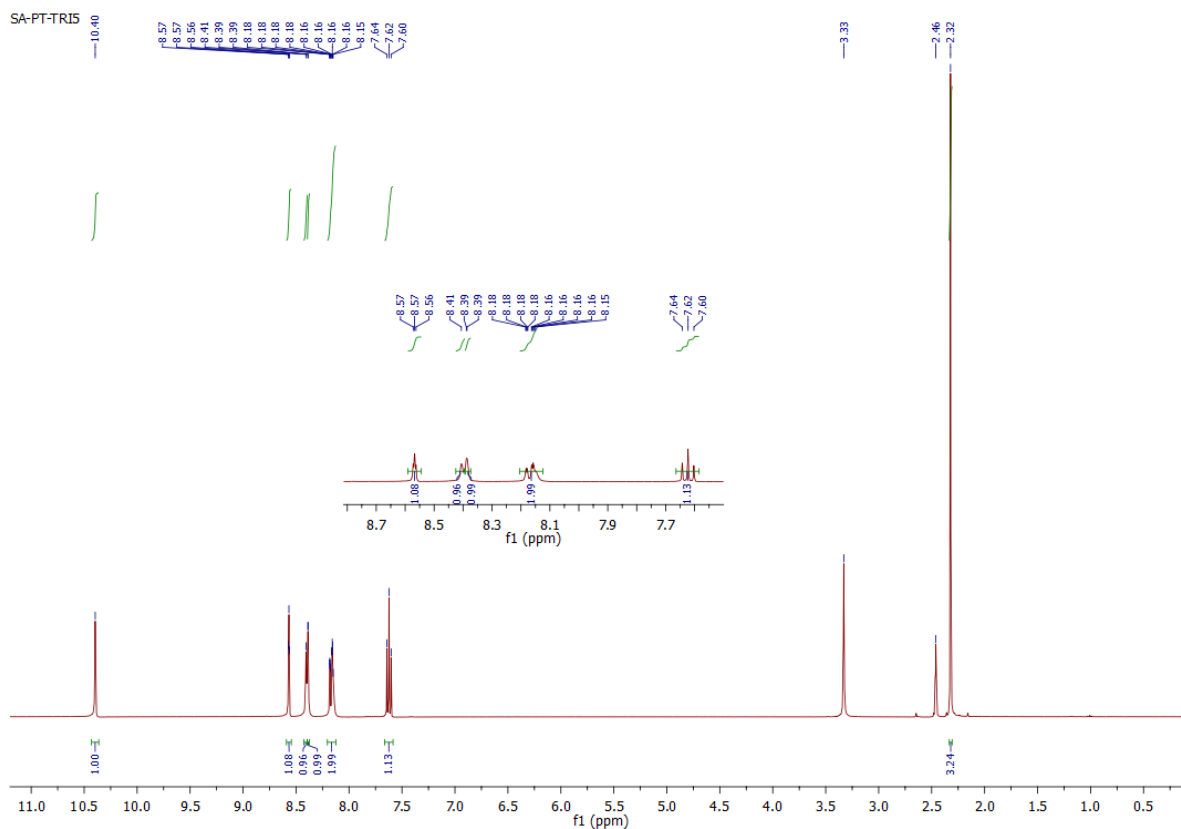

**Figure S33: <sup>1</sup>H NMR of synthesized compound 3h**



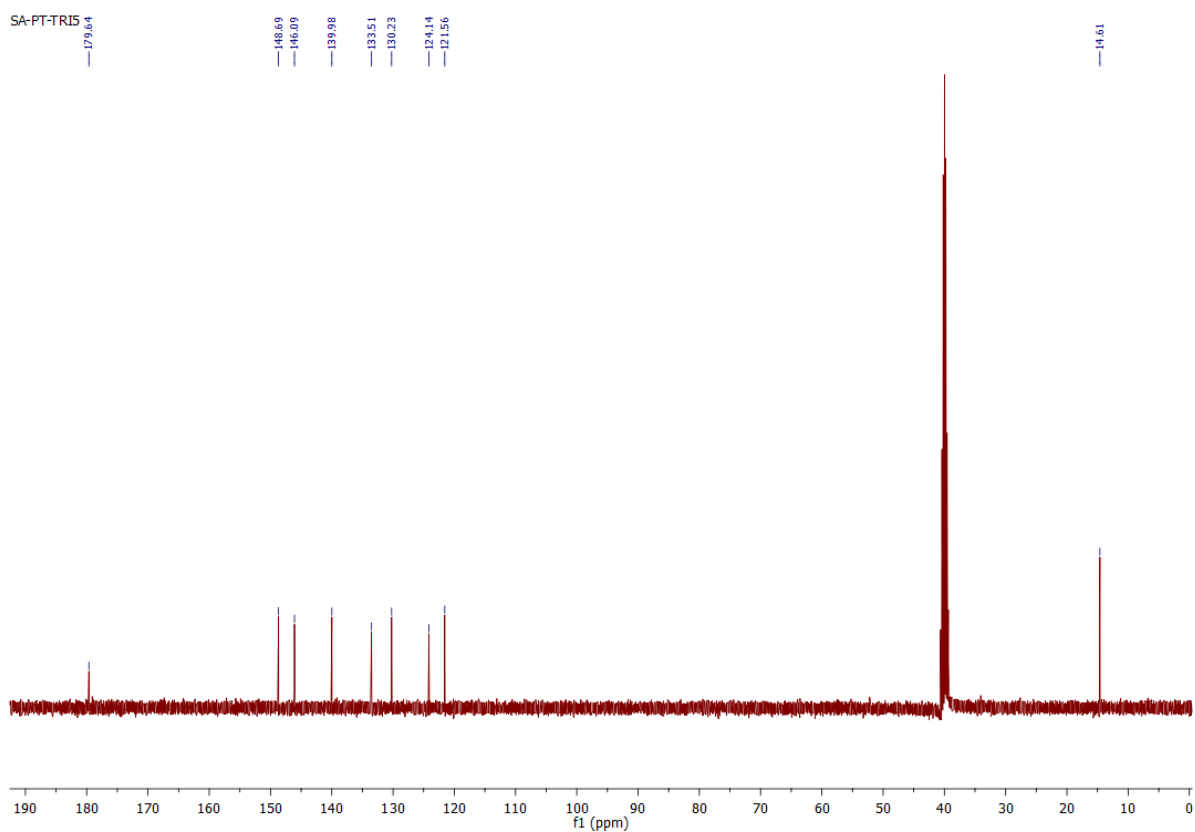

**Figure S34:**  $^{13}\text{C}$  NMR of synthesized compound **3h**

*5-(3-hydroxyphenyl)-5-methyl-1,2,4-triazolidine-3-thione (3i):*

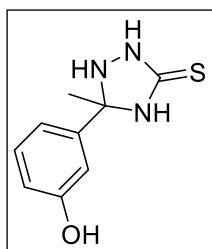

85% yield; m.p. 256-258 °C;  $^1\text{H}$  NMR (400 MHz,  $\text{DMSO-d}_6$ )  $\delta$  10.19 (s, 1H, OH), 9.43 (s, 1H, NH), 8.26 (s, 1H, NH), 7.76 (s, 1H, NH), 7.30 (d,  $J = 8.3$  Hz, 1H, Ar-H), 7.20 (d,  $J = 2.1$  Hz, 1H, Ar-H), 7.13 (t,  $J = 8.0$  Hz, 1H, Ar-H), 6.75 (d,  $J = 8.0$  Hz, 1H, Ar-H), 2.21 (s, 3H,  $\text{CH}_3$ ); NMR (101 MHz,  $\text{DMSO-d}_6$ )  $\delta$  179.34, 157.76, 148.57,

139.57, 129.73, 118.03, 116.78, 113.81, 14.73; LC-MS ( $\text{M}+\text{H}^+$ ): 210.0747.

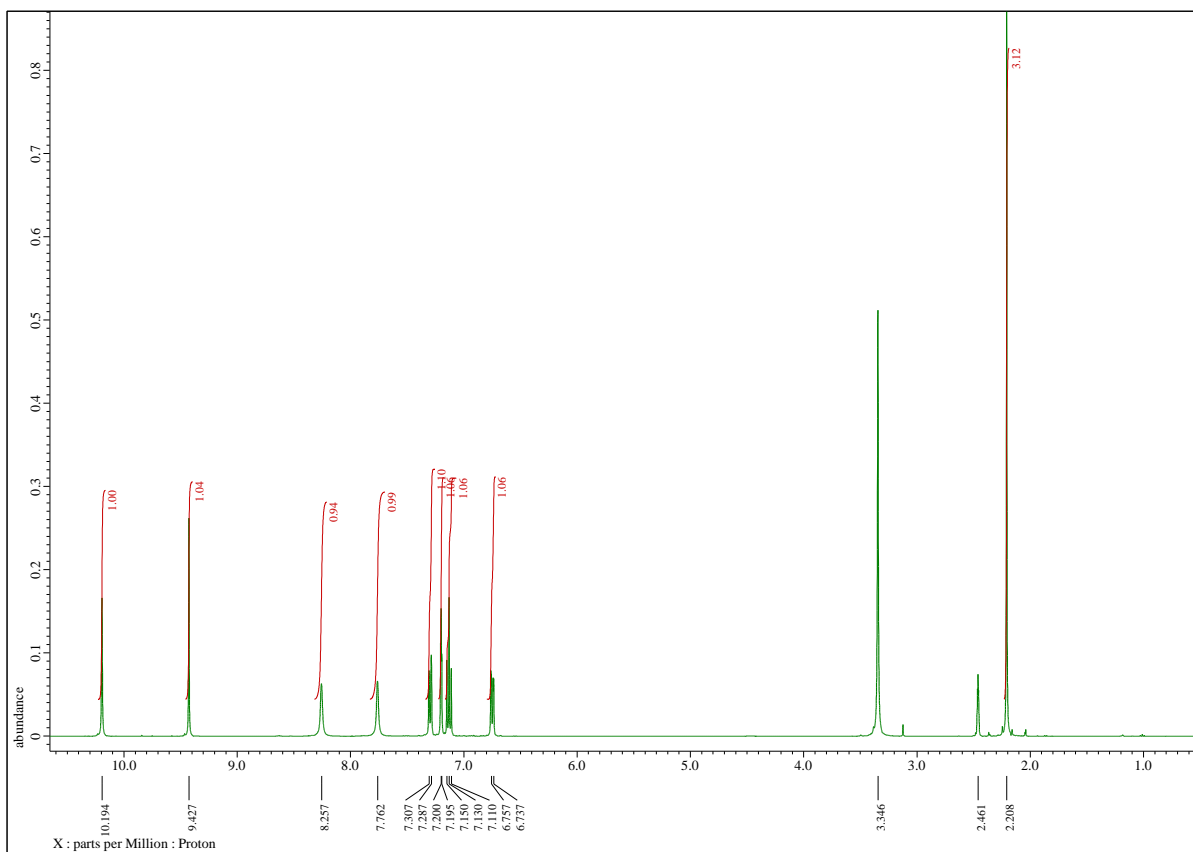

Figure S35:  $^1\text{H}$  NMR of synthesized compound 3i

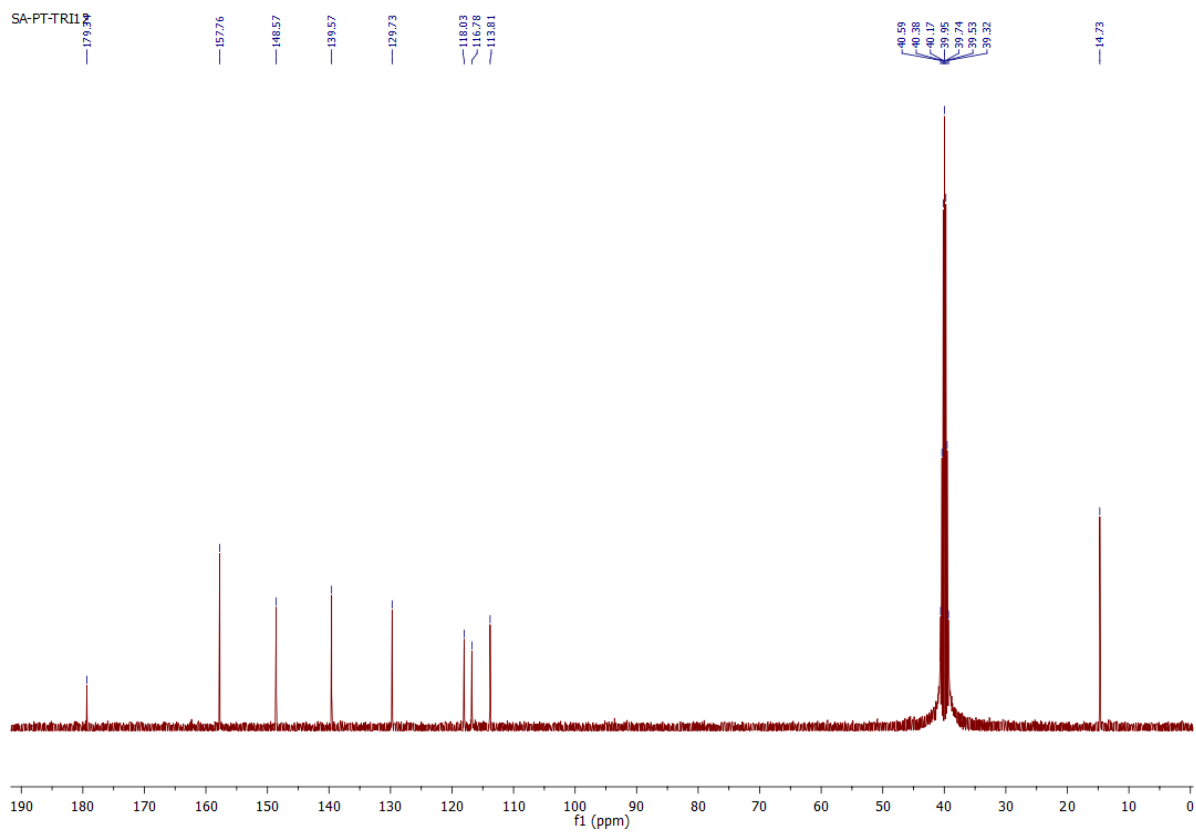

Figure S36:  $^{13}\text{C}$  NMR of synthesized compound 3i

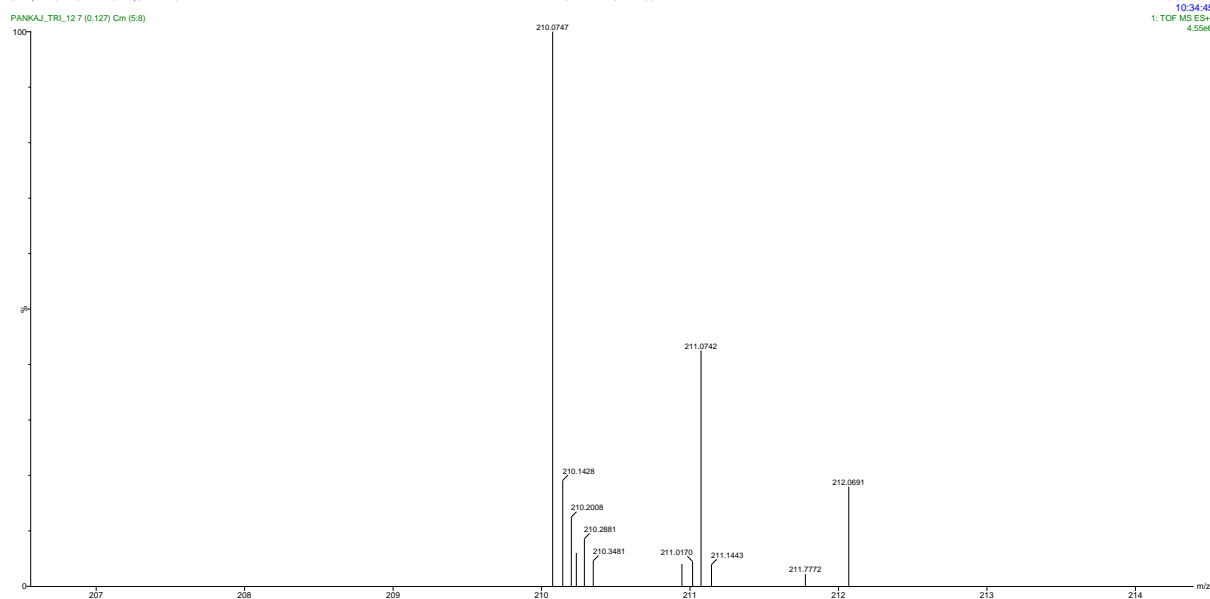

**Figure S37: Mass spectra of synthesized compound 3i**

*1,2,4-triazaspiro[4.4]nonane-3-thione (3j):*

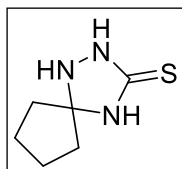

82% yield; m.p. 142-146 °C<sup>8</sup>; <sup>1</sup>H NMR (400 MHz, DMSO d<sub>6</sub>) δ 9.81 (s, 1H, NH), 7.95 (s, 1H, NH), 7.45 (s, 1H, NH), 2.31 (t, J = 7.3 Hz, 2H, CH<sub>2</sub>), 2.26 (t, J = 7.2 Hz, 2H, CH<sub>2</sub>), 1.74 – 1.66 (m, 2H, CH<sub>2</sub>), 1.65 – 1.58 (m, 2H, CH<sub>2</sub>); <sup>13</sup>C NMR (101 MHz, DMSO d<sub>6</sub>) δ 178.61, 164.08, 33.59, 28.99, 25.09, 24.85.

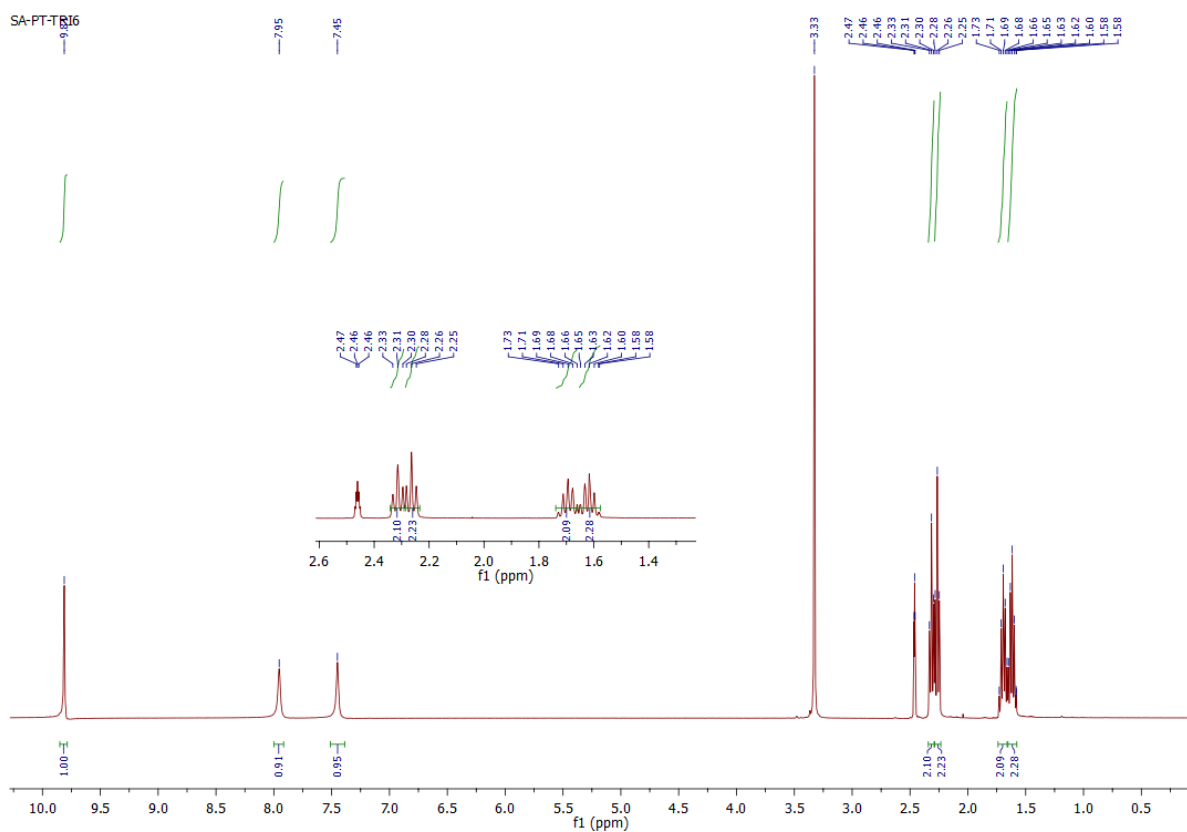

Figure S38:  $^1\text{H}$  NMR of synthesized compound 3j

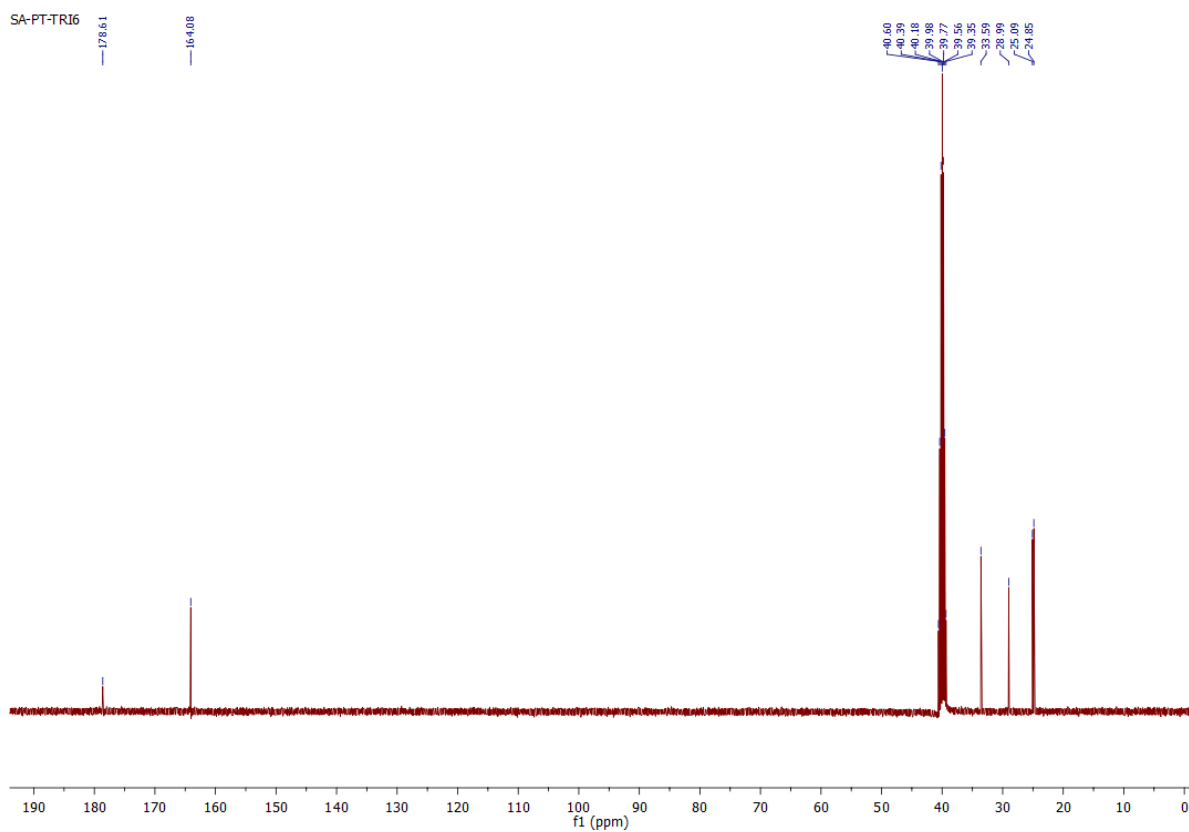

Figure S39:  $^{13}\text{C}$  NMR of synthesized compound 3j

*1,2,4-triazaspiro[4.5]decane-3-thione (3k)*:

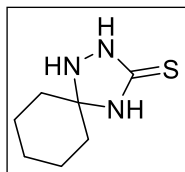

80% yield; m.p. 150-154 °C<sup>8</sup>; <sup>1</sup>H NMR (400 MHz, DMSO d<sub>6</sub>) δ 10.14 (s, 1H, NH), 7.95 (s, 1H, NH), 7.49 (s, 1H, NH), 2.35 (s, 2H, CH<sub>2</sub>), 2.22 – 2.02 (m, 2H, CH<sub>2</sub>), 1.60 – 1.37 (m, 6H, CH<sub>2</sub>); <sup>13</sup>C NMR (101 MHz, DMSO d<sub>6</sub>) δ 178.96, 157.46, 35.43, 27.73, 27.45, 26.26, 25.58.

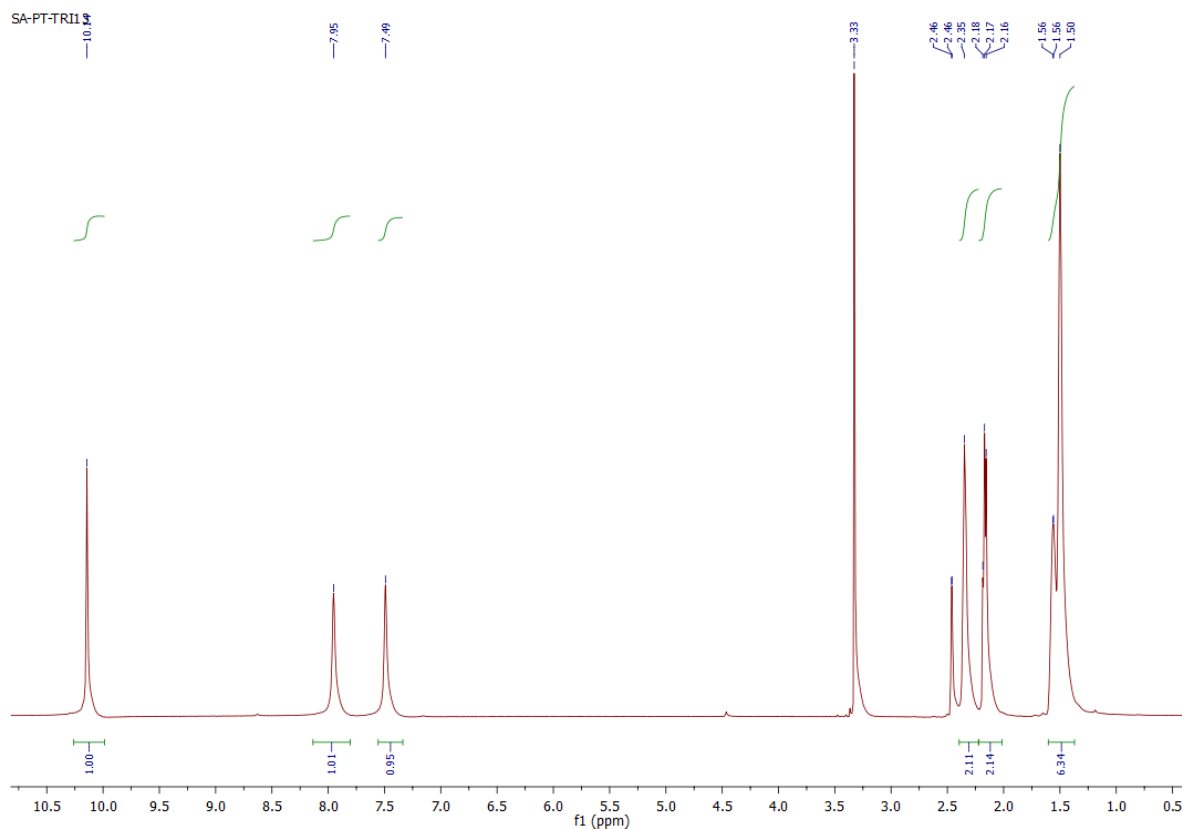

**Figure S40:** <sup>1</sup>H NMR of synthesized compound 3k

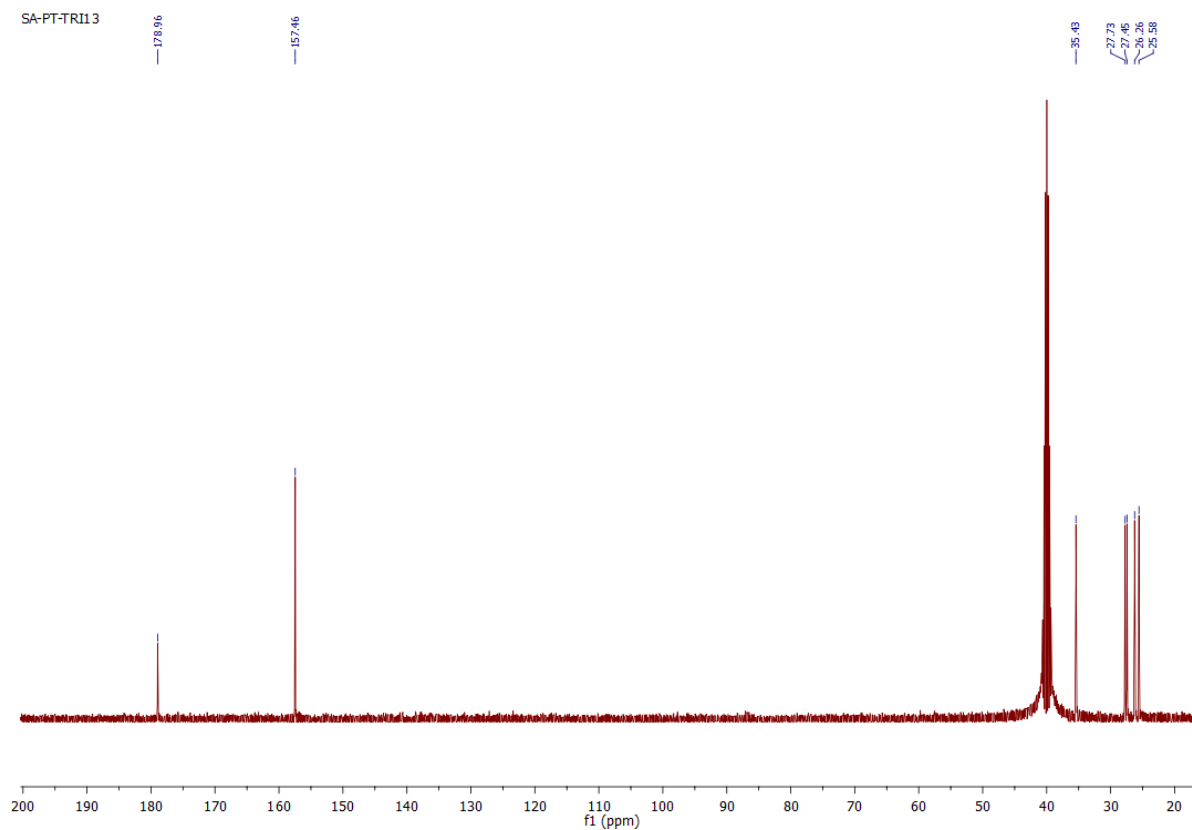

**Figure S41:**  $^{13}\text{C}$  NMR of synthesized compound **3k**

*5,5',5''-(((1,3,5-triazine-2,4,6-triyl)tris(oxy))tris(benzene-4,1-diyl))tris(1,2,4-triazolidine-3-thione) (10l):*

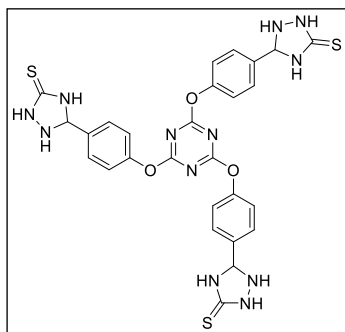

92% yield; m.p. 431-435 °C;  $^1\text{H}$  NMR (400 MHz, DMSO  $d_6$ )  $\delta$  11.46 (s, 3H, NH), 8.21 (s, 3H, NH), 8.03 (s, 3H, NH), 7.99 (s, 3H, CH), 7.84 (d,  $J = 8.8$  Hz, 6H, Ar-H), 7.27 (d,  $J = 8.7$  Hz, 6H, Ar-H);  $^{13}\text{C}$  NMR (101 MHz, DMSO  $d_6$ )  $\delta$  178.44, 173.40, 152.78, 141.58, 132.69, 129.06, 122.19; HRMS ( $\text{M}+\text{H}^+$ ): 661.1327.

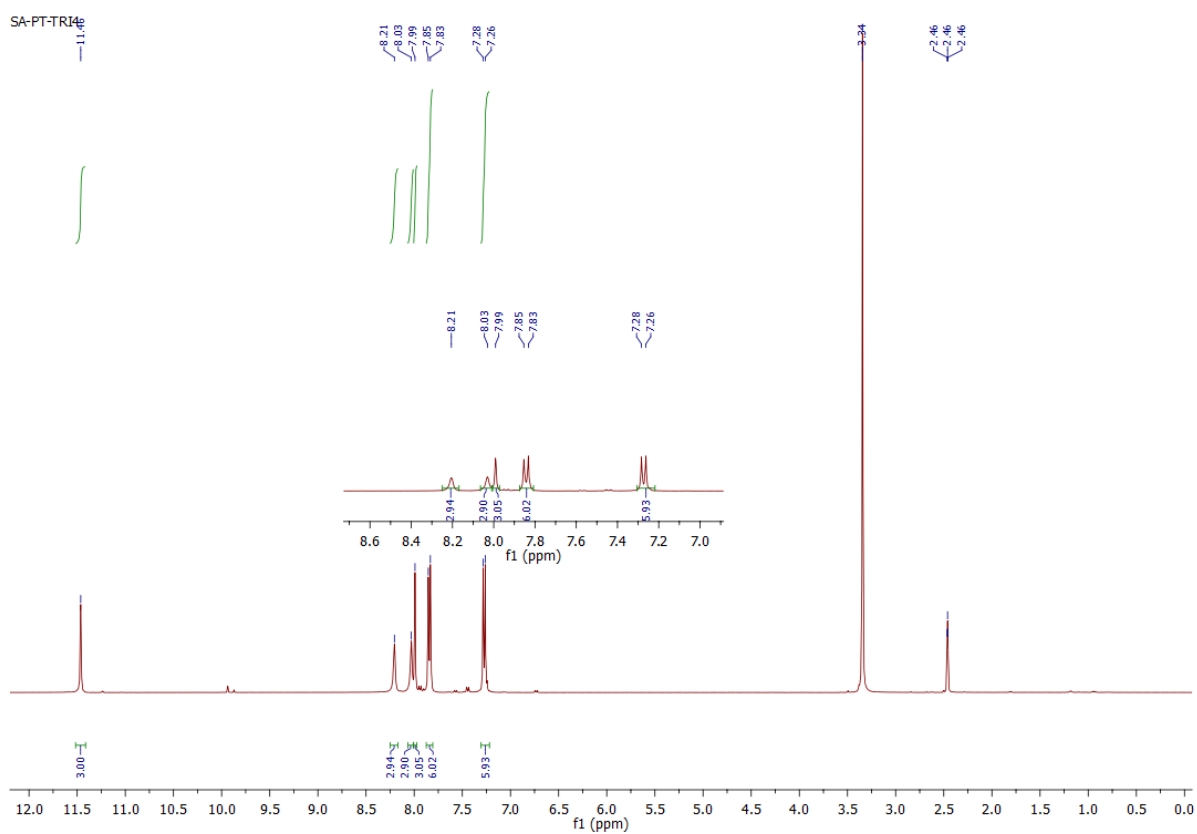

Figure S42:  $^1\text{H}$  NMR of synthesized compound 31

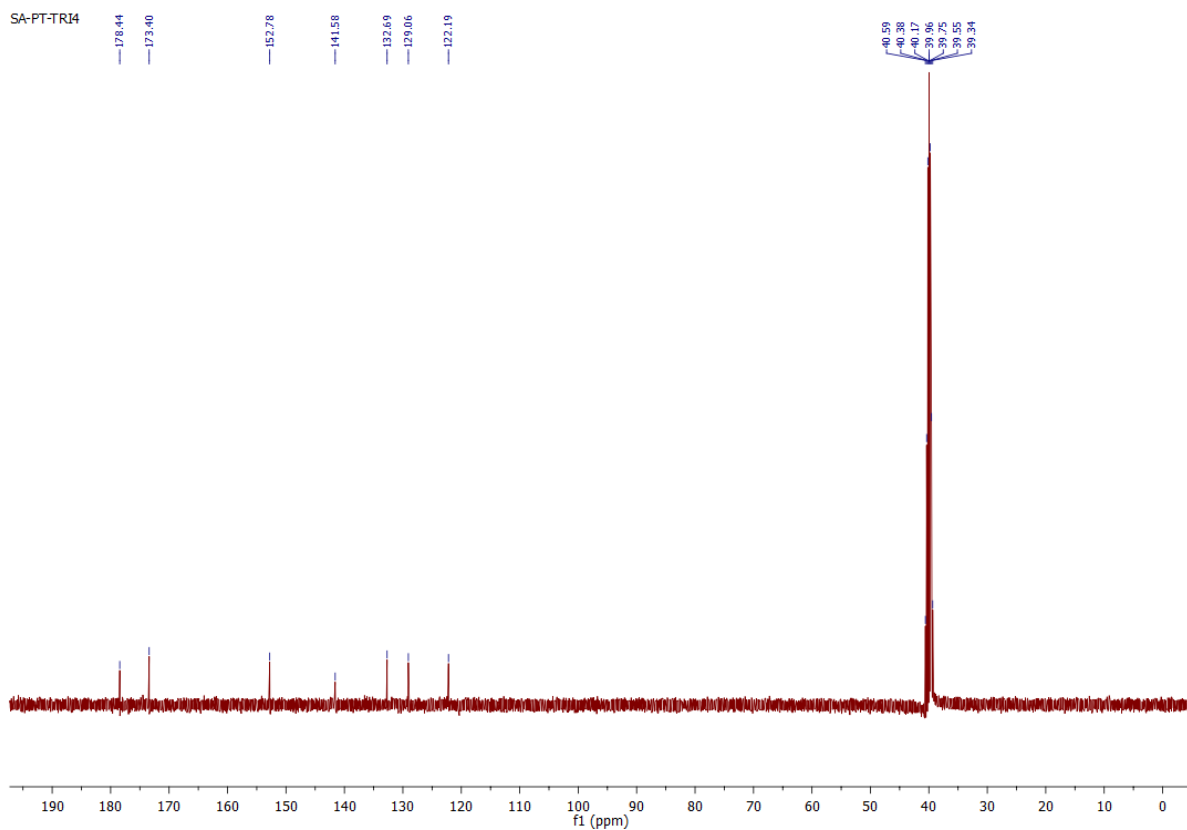

**Figure S43:  $^{13}\text{C}$  NMR of synthesized compound 31**

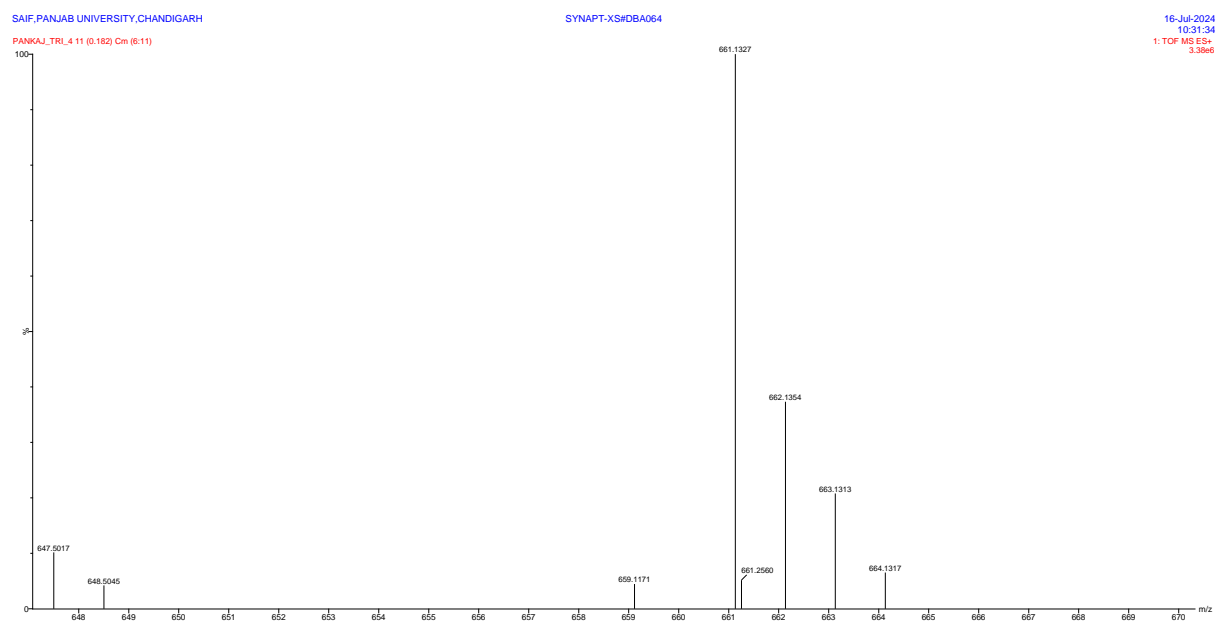

**Figure S44: Mass spectra of synthesized compound 31**



## References

1. Mikroyannidis, J. A.; Sharma, S.; Vijay, Y.; Sharma, G., Novel low band gap small molecule and phenylenevinylene copolymer with cyanovinylene 4-nitrophenyl segments: synthesis and application for efficient bulk heterojunction solar cells. *ACS Applied Materials & Interfaces* **2010**, *2* (1), 270-278.
2. Ahmed, L. R.; EL-Mahdy, A. F.; Pan, C.-T.; Kuo, S.-W., A water-soluble copper-immobilized covalent organic framework functioning as an "OFF-ON" fluorescent sensor for amino acids. *Materials Advances* **2021**, *2* (14), 4617-4629.
3. Gan, S.-X.; Jia, C.; Qi, Q.-Y.; Zhao, X., A facile and scalable synthetic method for covalent organic nanosheets: ultrasonic polycondensation and photocatalytic degradation of organic pollutants. *Chemical Science* **2022**, *13* (4), 1009-1015.
4. Pansambal, S.; Ghotekar, S.; Oza, R.; Deshmukh, K., Biosynthesis of CuO nanoparticles using aqueous extract of *Ziziphus mauritiana* L. leaves and their Catalytic performance for the 5-aryl-1, 2, 4-triazolidine-3-thione derivatives synthesis. *Int. J. Sci. Res. Sci. Technol* **2019**, *5* (4), 122-128.
5. Nami, N.; Lale Mohammadi, S., One-Pot Facile Synthesis of New 1, 2, 4-Triazolidine Derivatives Using Sodium Borohydride and Fe<sub>3</sub>O<sub>4</sub> Magnetic Nanoparticles (MNPs). *International Journal of Nanoscience and Nanotechnology* **2017**, *13* (4), 347-357.
6. Mahajan, P. G.; Dige, N. C.; Vanjare, B. D.; Raza, H.; Hassan, M.; Seo, S.-Y.; Kim, C.-H.; Lee, K. H., Synthesis and biological evaluation of 1, 2, 4-triazolidine-3-thiones as potent acetylcholinesterase inhibitors: in vitro and in silico analysis through kinetics, chemoinformatics and computational approaches. *Molecular Diversity* **2020**, *24*, 1185-1203.
7. Patil, P. B.; Patil, J. D.; Korade, S. N.; Kshirsagar, S. D.; Govindwar, S. P.; Pore, D. M., An efficient synthesis of anti-microbial 1, 2, 4-triazole-3-thiones promoted by acidic ionic liquid. *Research on Chemical Intermediates* **2016**, *42*, 4171-4180.
8. Ramesh, R.; Lalitha, A., PEG-assisted two-component approach for the facile synthesis of 5-aryl-1, 2, 4-triazolidine-3-thiones under catalyst-free conditions. *RSC Advances* **2015**, *5* (63), 51188-51192.
